# Supplementary material for: Unique pharmacodynamic properties and low abuse liability of the µ-opioid receptor ligand (S)-methadone
Source: Research Square preprint supplement (doi:10.21203/rs.3.rs-2644719/v1), 2023-03-23
Supplement: Supplementary file 1 [file 8d93abbdd4c5bf35e4624dbf.xlsx]

## Sheet: Sheet1
Figure	N and Sex	Measure	Comparison	Analysis	Effect	Test	P	Mean	SEM
1b	Rat brain homogenate (no cerebellum)	Ki		Nonlinear fit	(R,S)-methaodne			15.6 nM	95% CI: 10.85 nM to 22.59 nM
	male n = 3 per drug				(R)-methadone			7.534 nM	95% CI: 4.713 nM to 12.08 nM
					(S)-methadone			60.46 nM	95% CI: 40.23 nM to 90.39 nM
		IC50		Nonlinear fit	(R,S)-methaodne			21.44 nM	95% CI: 15.98 nM to 33.34 nM
					(R)-methadone			11.84 nM	95% CI: 7.393 nM to 25.22 nM
					(S)-methadone			97.48 nM	95% CI: 43.95 nM to 146.9 nM
1d	2 ROIs from female, 2 ROI from male	[35S]GTPγS in Nac (% basal)	Drug	Two-Way ANOVA	Drug x Concentration Interaction	F(2, 18) = 0.481	0.6259
					Concentraion	F(1, 18) = 6.306	0.0218
					Drug	F(2, 18) = 6.696	0.0067
				Holm-Šídák's multiple comparisons test	100 nM: RS vs R	t (18) = 2.588	0.0399	110.8 vs 151.2	4.794 vs 18.861
					100 nM: RS vs S	t (18) = 0.1514	0.8814	110.8 vs 108.412	4.794 vs 2.465
					100 nM: R vs S	t (18) = 2.740	0.0399	151.247 vs 108.412	18.861 vs 2.465
					1 μM: RS vs R	t (18) = 1.212	0.4241	144.994 vs 163.948	5.378 vs 13.235
					1 μM: RS vs S	t (18) = 0.9908	0.4241	144.994 vs 129.502	5.378 vs 12.022
					1 μM: R vs S	t (18) = 2.203	0.1176	163.948 vs 13.235	13.235 vs 12.022
1e	2 ROIs from female, 2 ROI from male	[35S]GTPγS in CPu (% basal)	Drug	Two-Way ANOVA	Drug x Concentration Interaction	F(2, 18) = 1.927	0.1744
					Concentraion	F(1, 18) = 32.07	<0.0001
					Drug	F(2, 18) = 18.29	<0.0001
				Holm-Šídák's multiple comparisons test	100 nM: RS vs R	t (18) = 2.622	0.0342	110.656 vs 170.896	6.056 vs 24.532
					100 nM: RS vs S	t (18) = 0.2599	0.7979	110.656 vs 104.685	6.056 vs 5.452
					100 nM: R vs S	t (18) = 2.882	0.0295	170.896 vs 104.685	24.532 vs 5.452
					1 μM: RS vs R	t (18) = 3.090	0.0126	198.540 vs 269.533	7.887 vs 27.225
					1 μM: RS vs S	t (18) = 2.396	0.0277	198.540 vs 143.502	7.887 vs 10.559
					1 μM: R vs S	t (18) = 5.486	<0.0001	269.533 vs 143.502	27.225 vs 10.559
2a	male n = 5 per drug	Hot plate latency ED50		Nonlinear fit	(R,S)-methaodne			1.235 mg/kg	95% CI: ??? to 1.403 mg/kg
					(R)-methadone			0.5032 mg/kg	95% CI: 0.4409 mg/kg to 0.5748 mg/kg
					(S)-methadone			17.90 mg/kg	95% CI: 13.76 mg/kg to 23.05 mg/kg
2b	male n = 5 per drug	Catalepsy ED50		Nonlinear fit	(R,S)-methaodne			2.109 mg/kg	95% CI: 1.836 mg/kg to 2.412 mg/kg
					(R)-methadone			0.9284 mg/kg	95% CI: 0.7850 mg/kg to 1.083 mg/kg
					(S)-methadone			59.38 mg/kg	95% CI: 45.58 mg/kg to 81.11 mg/kg
2c	Female n = 4, male n = 4	(RS)-methadone IVSA training	Lever presses (FR1)	Repeated Measures Two-Way ANOVA	Session x Lever interaction	F (9, 126) = 3.410	0.0009
					Session	F (9, 126) = 2.050	0.039
					Lever	F (1, 14) = 15.58	0.0015
				Holm-Šídák's multiple comparisons test	Active vs Inactive - Session 1	t (140) = 0.9217	0.3582	16.13 vs 9.75	2.580 vs 1.952
					Session 2	t (140) = 2.404	0.0348	26.25 vs 9.625	8.634 vs 2.441
					Session 3	t (140) = 2.584	0.032	24.38 vs 6.5	8.837 vs 1.349
					Session 4	t (140) = 3.018	0.012	25.25 vs 4.375	8.955 vs 1.084
					Session 5	t (140) = 3.163	0.0095	26.63 vs 4.75	4.275 vs 1.161
					Session 6	t (140) = 4.627	<0.0001	36.88 vs 4.875	6.975 vs 1.816
					Session 7	t (140) = 4.5	0.0001	34.13 vs 3	5.795 vs 1.133
					Session 8	t (140) = 4.012	0.0008	32 vs 4.25	5.049 vs 2.144
					Session 9	t (140) = 3.398	0.0053	32.88 vs 9.375	5.047 vs 3.150
					Session 10	t (140) = 3.832	0.0013	35 vs 8.5	6.729 vs 2.964
			Lever Presses (FR5)	Repeated Measures Two-Way ANOVA	Session x Lever interaction	F (4, 56) = 10.84	<0.0001
					Session	F (4, 56) = 6.464	0.0002
					Lever	F (1, 14) = 19.40	0.0006
				Holm-Šídák's multiple comparisons test	Active vs Inactive - Session 11	t (70) = 1.846	0.0692	57.625 vs 17.75	11.39 vs 3.138
					Session 12	t (70) = 3.483	0.0017	87 vs 11.75	17.361 vs 1.915
					Session 13	t (70) = 4.536	<0.0001	106.625 vs 8.625	23.521 vs 1.87
					Session 14	t (70) = 5.166	<0.0001	120.875 vs 9.25	24.519 vs 2.769
					Session 15	t (70) = 5.271	<0.0001	123.25 vs 9.375	26.821 vs 2.052
2d	Female n = 2, male n = 3	(R)-methadone IVSA training	Lever presses (FR1)	Repeated Measures Two-Way ANOVA	Session x Lever interaction	F (9, 72) = 4.448	0.0001
					Session	F (9, 72) = 5.596	<0.0001
					Lever	F (1, 8) = 5.761	0.0432
				Holm-Šídák's multiple comparisons test	Active vs Inactive - Session 1	t (80) = 0.9599	0.8102	13.2 vs 6.4	7.767 vs 2.803
					Session 2	t (80) = 0.847	0.8102	15 vs 9	6.363 vs 3.987
					Session 3	t (80) = 0.9035	0.8102	13.6 vs 7.2	5.334 vs 0.916
					Session 4	t (80) = 1.101	0.7985	10 vs 2.2	5.357 vs 0.8
					Session 5	t (80) = 0.7623	0.8102	10.6 vs 5.2	4.478 vs 2.31
					Session 6	t (80) = 1.638	0.4876	20.4 vs 8.8	5.344 vs 2.353
					Session 7	t (80) = 2.908	0.0325	27.6 vs 7	7.723 vs 1.673
					Session 8	t (80) = 3.783	0.003	33.8 vs 7	7.651 vs 5.089
					Session 9	t (80) = 3.162	0.0176	30 vs 7.6	6.906 vs 2.925
					Session 10	t (80) = 3.699	0.0036	31.4 vs 5.2	7.004 vs 2.615
	two female and two male rats previously		Lever Presses (FR5)	Repeated Measures Two-Way ANOVA	Session x Lever interaction	F (4, 64) = 1.856	0.1292
	trained on (S)-methadone were added				Session	F (4, 64) = 3.985	0.006
	Total female n = 4, male n = 5				Lever	F (1, 16) = 17.31	0.0007
				Holm-Šídák's multiple comparisons test	Active vs Inactive - Session 11	t (80) = 2.961	0.0044	49.89 vs 6.333	9.016 vs 1.394
					Session 12	t (80) = 3.512	0.0022	60.89 vs 9.222	13.914 vs 2.851
					Session 13	t (80) = 3.165	0.0044	53.56 vs 7	12.427 vs 1.509
					Session 14	t (80) = 4.275	0.0002	74.78 vs 11.89	17.545 vs 5.075
					Session 15	t (80) = 4.569	<0.0001	78.44 vs 11.22	17.056 vs 3.992
2e	Female n = 4, male n = 4	(S)-methadone IVSA training	Lever presses (FR1)	Repeated Measures Two-Way ANOVA	Session x Lever interaction	F (9, 126) = 5.409	<0.0001
					Session	F (9, 126) = 2.563	0.0097
					Lever	F (1, 14) = 12.78	0.0031
				Holm-Šídák's multiple comparisons test	Active vs Inactive - Session 1	t (140) = 0.9442	0.5732	20.25 vs 13.88	5.024 vs 3.897
					Session 2	t (140) = 0.2037	0.8389	14.25 vs 12.88	3.759 vs 3.893
					Session 3	t (140) = 1.352	0.446	14.5 vs 5.375	3.535 vs 1.475
					Session 4	t (140) = 2.814	0.0222	24.63 vs 5.625	5.842 vs 1.051
					Session 5	t (140) = 3.203	0.0101	30.63 vs 9	9.088 vs 3.343
					Session 6	t (140) = 4.184	0.0005	35.13 vs 6.875	7.716 vs 3.215
					Session 7	t (140) = 3.61	0.003	29 vs 4.625	6.51 vs 1.782
					Session 8	t (140) = 3.833	0.0015	29.5 vs 3.625	6.858 vs 1.375
					Session 9	t (140) = 2.944	0.0188	24.63 vs 4.75	5.185 vs 1.305
					Session 10	t (140) = 4.962	<0.0001	38.13 vs 4.625	6.846 vs 1.591
			Lever Presses (FR5)	Repeated Measures Two-Way ANOVA	Session x Lever interaction	F (4, 56) = 1.204	0.3195
					Session	F (4, 56) = 0.2284	0.9214
					Lever	F (1, 14) = 21.72	0.0004
				Holm-Šídák's multiple comparisons test	Active vs Inactive - Session 11	t (70) = 3.78	0.0016	40.25 vs 7	5.954 vs 2.236
					Session 12	t (70) = 2.558	0.0619	37.63 vs 15.13	6.106 vs 3.248
					Session 13	t (70) = 2.97	0.0202	37.25 vs 11.13	4.868 vs 2.747
					Session 14	t (70) = 3.652	0.0025	42 vs 9.875	8.424 vs 2.174
					Session 15	t (70) = 4.647	<0.0001	47.75 vs 6.875	13.678 vs 2.133
2f	(R,S)-methadone female n =4, male n = 4	IVSA Dose Response Infusions			(R,S)-methadone: 6.25 μg/kg			11.25	1.333
					(R,S)-methadone: 12.5 μg/kg			12.75	2.763
					(R,S)-methadone: 25 μg/kg			25.375	6.735
					(R,S)-methadone: 50 μg/kg			32.5	6.236
					(R,S)-methadone: 100 μg/kg			21.125	4.274
					(R,S)-methadone: 200 μg/kg			14.875	2.416
	(R)-methadone female n = 4, male n = 5				(R)-methadone: 3.125 μg/kg			9.444	2.148
					(R)-methadone: 6.25 μg/kg			8.778	1.97
					(R)-methadone: 12.5 μg/kg			15.667	3.367
					(R)-methadone: 25 μg/kg			21.667	4.79
					(R)-methadone: 50 μg/kg			13.222	3.419
					(R)-methadone: 100 μg/kg			11	1.972
	(S)-methadone female n = 4, male n = 4				(S)-methadone: 25 μg/kg			5	0.756
					(S)-methadone: 50 μg/kg			5.75	1.666
					(S)-methadone: 100 μg/kg			6.875	1.597
					(S)-methadone: 200 μg/kg			9	2.528
					(S)-methadone: 500 μg/kg			8.25	2.548
					(S)-methadone: 1000 μg/kg			8.375	3.151
2h	Female n = 3, male n = 3 for each drug group	Percent occupancy of MORs	Drug	One-Way ANOVA		F (2, 14) = 2.482	0.1195
	one outlier removed from (R,S)-methadone	in CPu			(R,S)-methadone			98.98	0.4499
					(R)-methadone			92.23	4.218
					(S)-methadone			81.27	8.1
2i	Female n = 3, male n = 3 for each drug group	Percent occupancy of MORs	Drug	One-Way ANOVA		F (2, 14) = 3.721	0.0506
	one outlier removed from (R,S)-methadone	in Nac			(R,S)-methadone			99.33	0.4646
					(R)-methadone			90.93	4.506
					(S)-methadone			76.56	8.496
2j	Female n = 3, male n = 3 for each drug group	Percent occupancy of NMDARs	Drug	One-Way ANOVA		F (2, 15) = 0.5449	0.591
		in CPu			(R,S)-methadone			-4.271	5.398
					(R)-methadone			-6.261	4.122
					(S)-methadone			0.8749	5.341
2k	Female n = 3, male n = 3 for each drug group	Percent occupancy of NMDARs	Drug	One-Way ANOVA		F (2, 15) = 0.2600	0.7744
		in Nac			(R,S)-methadone			3.803	6.146
					(R)-methadone			1.085	3.916
					(S)-methadone			6.107	4.45
3b	male n = 8 per group	Acute locomtion from (R,S)-methadone	Dose	One-Way ANOVA		F (3, 28) = 112.0	<0.0001
		average of the square root of		Dunnett's multiple comparison test	0 vs 3	t (28) = 0.1708	0.8656	24.23 vs 23.48	2.56 vs 3.629
		centimeters traveled per ten minutes			0 vs 10	t (28) = 15.61	<0.0001	24.23 vs 92.49	2.56 vs 3.091
					0 vs 30	t (28) = 7.397	<0.0001	24.23 vs 56.59	2.56 vs 2.999
3c	male n = 12 for saline and 3 mg/kg	Acute locomtion from (R)-methadone	Dose	One-Way ANOVA		F (4, 43) = 106.2	<0.0001
	male n = 8 for 1, 10, and 30 mg/kg	average of the square root of		Dunnett's multiple comparison test	0 vs 1	t (43) = 0.2995	0.9954	23.85 vs 22.9	1.798 vs 1.785
		centimeters traveled per ten minutes			0 vs 3	t (43) = 3.943	0.0011	23.85 vs 35	1.798 vs 2.754
					0 vs 10	t (43) = 16.98	<0.0001	23.85 vs 77.53	1.798 vs 1.976
					0 vs 30	t (43) = 11.69	<0.0001	23.85 vs 60.82	1.798 vs 2.065
3d	male n = 8 per group	Acute locomtion from (S)-methadone	Dose	One-Way ANOVA		F (3, 28) = 2.845	0.0556
		average of the square root of		Dunnett's multiple comparison test	0 vs 10	t (28) = 0.2811	0.9846	24.23 vs 25.32	2.56 vs 3.989
		centimeters traveled per ten minutes			0 vs 30	t (28) = 2.214	0.0885	24.23 vs 15.62	2.56 vs 2.389
					0 vs 100	t (28) = 1.486	0.3305	24.23 vs 18.45	2.56 vs 1.429
3f	male n = 8 for saline,10 and 30 mg/kg (S)-MTD	Acute locomtion from (S)-methadone	Dose of (S)-MTD	One-Way ANOVA		F (3, 27) = 69.52	P<0.0001
	male n = 7 for 0 mg/kg (S)-MTD	antagonism of (R)-methadone		Dunnett's multiple comparison test	Saline vs 0 S + 10 R	t (27) = 18.91	<0.0001	29.03 vs 78.02	1.28 vs 2.729
		average of the square root of			Saline vs 10 S + 10 R	t (27) = 14.56	<0.0001	29.03 vs 65.48	1.28 vs 3.575
		centimeters traveled per ten minutes			Saline vs 10 S + 30 R	t (27) = 7.239	0.0001	29.03 vs 47.15	1.28 vs 2.041
					0 S + 10 R vs 10 S + 10 R	t (27) = 4.837	0.0102	78.02 vs 65.48	2.729 vs 3.575
					0 S + 10 R vs 30 S + 10 R	t (27) = 11.91	<0.0001	78.02 vs 47.15	2.729 vs 2.041
					10 S + 10 R vs 30 S + 10 R	t (27) = 7.324	0.0001	65.48 vs 47.15	3.575 vs 2.041
3h	female n = 4, male n = 4 per group	Psychomotor Sensitization for (R,S)-methadone	Day	Repeated Measures Two-Way ANOVA	Day x Dose Interaction	F (4, 42) = 1.244	0.3071
					Day	F (2, 42) = 1.164	0.3221
					Dose	F (2, 21) = 18.53	<0.0001
				Holm-Šídák's multiple comparisons test	4 mg/kg: D1 vs D2	t (42) = 0.4298	0.8344	9369 vs 10132	896.86 vs 1141.18
					4 mg/kg: D1 vs D3	t (42) = 0.5386	0.8344	9369 vs 8414	896.86 vs 781.27
					4 mg/kg: D2 vs D3	t (42) = 0.9684	0.7104	10132 vs 8414	1141.18 vs 781.27
					10 mg/kg: D1 vs D2	t (42) = 0.5723	0.8152	25067 vs 26083	1838.78 vs 3888.47
					10 mg/kg: D1 vs D3	t (42) = 0.8589	0.7789	25067 vs 26591	1838.78 vs 2870.78
					10 mg/kg: D2 vs D3	t (42) = 0.2866	0.8152	26083 vs 26591	3888.47 vs 2870.78
					20 mg/kg: D1 vs D2	t (42) = 0.643	0.5237	17097 vs 18237	2057.39 vs 2377.6
					20 mg/kg: D1 vs D3	t (42) = 2.293	0.0786	17097 vs 21166	2057.39 vs 1960.85
					20 mg/kg: D2 vs D3	t (42) = 1.65	0.2014	18237 vs 21166	2377.6 vs 1960.85
3i	female n = 4, male n = 4 per group	Psychomotor Sensitization for (R)-methadone	Day	Repeated Measures Two-Way ANOVA	Day x Dose Interaction	F (4, 42) = 1.495	0.221
					Day	F (2, 42) = 2.948	0.0634
					Dose	F (2, 21) = 18.09	<0.0001
				Holm-Šídák's multiple comparisons test	2 mg/kg: D1 vs D2	t (42) = 0.242	0.9931	6892 vs 7752	1047.25 vs 917.62
					2 mg/kg: D1 vs D3	t (42) = 0.1205	0.9931	6892 vs 7320	1047.25 vs 1191.5
					2 mg/kg: D2 vs D3	t (42) = 0.1215	0.9931	7752 vs 7320	917.62 vs 1191.5
					5 mg/kg: D1 vs D2	t (42) = 0.3553	0.7241	18236 vs 19499	3314.02 vs 4443.04
					5 mg/kg: D1 vs D3	t (42) = 1.294	0.4935	18236 vs 22835	3314.02 vs 4622.1
					5 mg/kg: D2 vs D3	t (42) = 0.9383	0.582	19499 vs 22835	4443.04 vs 4622.1
					10 mg/kg: D1 vs D2	t (42) = 3.073	0.0111	22790 vs 33714	4724.93 vs 2575.32
					10 mg/kg: D1 vs D3	t (42) = 2.199	0.0657	22790 vs 30607	4724.93 vs 3580.28
					10 mg/kg: D2 vs D3	t (42) = 0.8741	0.387	33714 vs 30607	2575.32 vs 3580.28
3j	female n = 4, male n = 4 per group	Psychomotor Sensitization for (S)-methadone	Day	Repeated Measures Two-Way ANOVA	Day x Dose Interaction	F (4, 42) = 1.051	0.3924
					Day	F (2, 42) = 2.698	0.079
					Dose	F (2, 21) = 0.3500	0.7087
					20 mg/kg D1			2107.75	462.659
					20 mg/kg D2			2354.5	357.877
					20 mg/kg D3			2204.62	271.871
					30 mg/kg D1			2522.88	934.404
					30 mg/kg D2			1733.88	380.717
					30 mg/kg D3			1251.62	224.338
					40 mg/kg D1			2722	603.957
					40 mg/kg D2			2353.25	581.519
					40 mg/kg D3			1875.75	489.98
3l	female n = 4, male n = 4 per group	Psychomotor Sensitization for (S)-methadone	Day	Repeated Measures Two-Way ANOVA	Day x Dose Interaction	F (4, 42) = 0.8391	0.5082
		antagonism of (R)-methadone			Day	F (2, 42) = 41.68	<0.0001
					(S)-methadone Dose	F (2, 21) = 14.77	<0.0001
				Holm-Šídák's multiple comparisons test	0 S + 10 R: D1 vs D2	t (42) = 2.698	0.0199	24866 vs 29799	2301.4 vs 2939.02
					0 S + 10 R: D1 vs D3	t (42) = 4.278	0.0003	24866 vs 32687	2301.4 vs 2707.44
					0 S + 10 R: D2 vs D3	t (42) = 1.58	0.1216	29799 vs 32687	2939.02 vs 2707.44
					10 S + 10 R: D1 vs D2	t (42) = 5.03	<0.0001	14378 vs 23574	14377.5 vs 23574
					10 S + 10 R: D1 vs D3	t (42) = 5.089	<0.0001	14378 vs 23681	14377.5 vs 23681.37
					10 S + 10 R: D2 vs D3	t (42) = 0.05873	0.9534	23574 vs 23681	23574 vs 23681.37
					30 S + 10 R: D1 vs D2	t (42) = 4.205	0.0003	8977 vs 16665	534.28 vs 2037.11
					30 S + 10 R: D1 vs D3	t (42) = 5.586	<0.0001	8977 vs 19188	534.28 vs 2262.24
					30 S + 10 R: D2 vs D3	t (42) = 1.38	0.1748	16665 vs 19188	2037.11 vs 2262.24
3n	male n = 7-9	Concentration of dopamine in microdialysate	Drug	Wilcoxon test	(R)-methadone 3 μM	W (7) = 26.00	0.0312	median: 0.2052 vs 0.3289	Interquartile Range: 0.1259 to 0.3149 vs 0.1784 to 6470
					(R)-methadone 10 μM	W (9) = 43.00	0.0078	median: 0.2593 vs 0.3543	Interquartile Range: 0.1755 to 0.4465 vs 0.3355 to 0.7679
					(S)-methadone 10 μM	W (7) = 4.00	0.8125	median: 0.1166 vs 0.0639	Interquartile Range: 0.0577 to 0.9297 vs 0.0355 to 1.009
					(S)-methadone 100 μM	W (8) = -4.00	0.8438	median: 0.2735 vs 0.3362	Interquartile Range: 0.0498 to 0.5509 vs 0.0409 to 0.4171
3m	male n = 8	Concentration of dopamine in microdialysate	Drug	Wilcoxon test	(S) 100 μM + (R) 10 μM	W (8) = 6.00	0.7422	median: 0.0520 vs 0.0665	Interquartile Range: 0.0226 to 0.4523 vs 0.0259 to 0.2406
3o	4 ROIs from female, 4 ROI from male	[35S]GTPγS in VTA (% basal)	Drug	One-Way ANOVA		F (2, 21) = 3.508	0.0485
				Holm-Šídák's multiple comparisons test	0 S + 1 R vs 1 S + 1 R	t (21) = 1.217	0.3072	121.6 vs 114.9	3.335 vs 4.454
					0 S + 1 R vs 10 S + 1 R	t (21) = 2.646	0.0446	121.6 vs 107.1	3.335 vs 3.788
					1 S + 1 R vs 10 S + 1 R	t (21) = 1.429	0.3072	114.9 vs 107.1	4.454 vs 3.788
			Theoretical mean = 100	One Sample t test	0 S + 1 R	t (7) = 6.481	0.0003	121.6	3.335
					1 S + 1 R	t (7) = 3.351	0.0122	114.9	4.454
					10 S + 1 R	t (7) = 1.867	0.1042	107.1	3.788
4c	HEK-293T cells, n = 6 per drug	BRET Emax	Drug	Repeated Measures One-Way ANOVA	Treatment	F (1.561, 7.805) = 41.79	0.0001
				Dunnett's multiple comparison test	(R)-methadone vs (R,S)-methadone	t (5) = 4.31	0.0134	0.01767 vs 0.01536	0.001 vs 0.001
					(R)-methadone vs (S)-methadone	t (5) = 8.434	0.0007	0.01767 vs 0.0108	0.001 vs 0.001
4d	HEK-293T cells, n = 6 per drug	BRET EC50	Drug	Friedman test		χ2 (2) = 12.00	0.0001
				Dunn's multiple comparison test	(R,S)-methadone vs (R)-methadone	z = 1.732	0.2498	median: 1.12E-06 vs 4.81E-07	Interquartile Range: 9.48E-07 to 1.31E-06 vs 3.79E-07 to 6.14E-07
					(R,S)-methadone vs (S)-methadone	z = 1.732	0.2498	median: 1.12E-06 vs 4.11E-06	Interquartile Range: 9.48E-07 to 1.31E-06 vs 3.29E-06 to 7.76E-06
					(R)-methadone vs (S)-methadone	z = 3.464	0.0016	median: 4.81E-07 vs 4.11E-06	Interquartile Range: 3.79E-07 to 6.14E-07 vs 3.29E-06 to 7.76E-06
4f	HEK-293T cells, n = 7 per drug	Normalized BRET ratio (vesrsus basal)	Drug	Repeated Measures One-Way ANOVA	Treatment	F (1.784, 10.71) = 100.4	<0.0001
				Dunnett's multiple comparison test	(R)-methadone vs basal	t (6) = 12.00	<0.0001	0.9804 vs 0.9609	0.0076 vs 0.0080
					(R)-methadone (S)- + (R)-methadone vs basal	t (6) = 9.914	<0.0001	0.9741 vs 0.9609	0.0069 vs 0.0080
4i	HEK-293T cells, n = 6 per drug	CODA-RET Emax	Drug	Paired t test	(R)-methadone vs (R,S)-methadone	t (5) = 1.594	0.1719
4j	HEK-293T cells, n = 6 per drug	CODA-RET EC50	Drug	Wilcoxon test	(R)-methadone vs (R,S)-methadone	W (5) = -21.00	0.0313	median: 5.26E-03 vs 3.97E-03	Interquartile Range: 4.08E-03 to 5.69E-03 vs 3.24E-03 to 4.94E-03
4l	HEK-293T cells, n = 9 per drug	Normalized BRET ratio (vesrsus basal)	Drug	Repeated Measures One-Way ANOVA	Treatment	F (1.931, 15.45) = 91.38	<0.0001
				Dunnett's multiple comparison test	(R)-methadone vs basal	t (8) = 11.04	<0.0001	0.8897 vs 0.8841	0.0042 vs 0.0044
					(R)-methadone (S)- + (R)-methadone vs basal	t (8) = 2.530	0.0621	0.8828 vs 0.8841	0.0046 vs 0.0044
S1a	male n = 5 per dose	Catalepsy time course for (R,S)-methadone	Dose	Repeated Measures Two-Way ANOVA	Dose x Time Interaction	F (20, 126) = 17.15	<0.0001
		%MPE			Time	F (5, 126) = 44.16	<0.0001
					Dose	F (4, 126) = 179.6	<0.0001
				Tukey's multiple comparison test	0 min: Vehicle vs 0.3 mg/kg	t (126) = 0	>0.9999	0.0 vs 0.0	0.0 vs 0.0
					0 min: Vehicle vs 1 mg/kg	t (126) = 0	>0.9999	0.0 vs 0.0	0.0 vs 0.0
					0 min: Vehicle vs 3 mg/kg	t (126) = 2.53E-15	>0.9999	0.0 vs 0.0	0.0 vs 0.0
					0 min: Vehicle vs 10 mg/kg	t (126) = 0	>0.9999	0.0 vs 0.0	0.0 vs 0.0
					0 min: 0.3 mg/kg vs 1 mg/kg	t (126) = 0	>0.9999	0.0 vs 0.0	0.0 vs 0.0
					0 min: 0.3 mg/kg vs 3 mg/kg	t (126) = 2.53E-15	>0.9999	0.0 vs 0.0	0.0 vs 0.0
					0 min: 0.3 mg/kg vs 10 mg/kg	t (126) = 0	>0.9999	0.0 vs 0.0	0.0 vs 0.0
					0 min: 1 mg/kg vs 3 mg/kg	t (126) = 2.53E-15	>0.9999	0.0 vs 0.0	0.0 vs 0.0
					0 min: 1 mg/kg vs 10 mg/kg	t (126) = 0	>0.9999	0.0 vs 0.0	0.0 vs 0.0
					0 min: 3 mg/kg vs 10 mg/kg	t (126) = 2.53E-15	>0.9999	0.0 vs 0.0	0.0 vs 0.0
					15 min: Vehicle vs 0.3 mg/kg	t (126) = 1.191	0.9169	6.7 vs 0.0	6.7 vs 0.0
					15 min: Vehicle vs 1 mg/kg	t (126) = 2.364	0.4552	6.7 vs 20.0	6.7 vs 8.2
					15 min: Vehicle vs 3 mg/kg	t (126) = 8.283	<0.0001	6.7 vs 53.3	6.7 vs 8.2
					15 min: Vehicle vs 10 mg/kg	t (126) = 16.02	<0.0001	6.7 vs 93.0	6.7 vs 6.7
					15 min: 0.3 mg/kg vs 1 mg/kg	t (126) = 3.555	0.0941	0.0 vs 20.0	0.0 vs 8.2
					15 min: 0.3 mg/kg vs 3 mg/kg	t (126) = 9.473	<0.0001	0.0 vs 53.3	0.0 vs 8.2
					15 min: 0.3 mg/kg vs 10 mg/kg	t (126) = 17.26	<0.0001	0.0 vs 93.0	0.0 vs 6.7
					15 min: 1 mg/kg vs 3 mg/kg	t (126) = 5.919	0.0005	20.0 vs 53.3	8.2 vs 8.2
					15 min: 1 mg/kg vs 10 mg/kg	t (126) = 13.55	<0.0001	20.0 vs 93.0	8.2 vs 6.7
					15 min: 3 mg/kg vs 10 mg/kg	t (126) = 7.37	<0.0001	53.3 vs 93.0	8.2 vs 6.7
					30 min: Vehicle vs 0.3 mg/kg	t (126) = 2.53E-15	>0.9999	0.0 vs 0.0	0.0 vs 0.0
					30 min: Vehicle vs 1 mg/kg	t (126) = 3.555	0.0941	0.0 vs 20.0	0.0 vs 8.2
					30 min: Vehicle vs 3 mg/kg	t (126) = 14.22	<0.0001	0.0 vs 80.0	0.0 vs 8.2
					30 min: Vehicle vs 10 mg/kg	t (126) = 18.56	<0.0001	0.0 vs 100.0	0.0 vs 0.0
					30 min: 0.3 mg/kg vs 1 mg/kg	t (126) = 3.555	0.0941	0.0 vs 20.0	0.0 vs 8.2
					30 min: 0.3 mg/kg vs 3 mg/kg	t (126) = 14.22	<0.0001	0.0 vs 80.0	0.0 vs 8.2
					30 min: 0.3 mg/kg vs 10 mg/kg	t (126) = 18.56	<0.0001	0.0 vs 100.0	0.0 vs 0.0
					30 min: 1 mg/kg vs 3 mg/kg	t (126) = 10.66	<0.0001	20.0 vs 80.0	8.2 vs 8.2
					30 min: 1 mg/kg vs 10 mg/kg	t (126) = 14.85	<0.0001	20.0 vs 100.0	8.2 vs 0.0
					30 min: 3 mg/kg vs 10 mg/kg	t (126) = 3.713	0.0718	80.0 vs 100.0	8.2 vs 0.0
					60 min: Vehicle vs 0.3 mg/kg	t (126) = 1.191	0.9169	6.7 vs 0.0	6.7 vs 0.0
					60 min: Vehicle vs 1 mg/kg	t (126) = 2.53E-15	>0.9999	6.7 vs 6.7	6.7 vs 6.7
					60 min: Vehicle vs 3 mg/kg	t (126) = 11.84	<0.0001	6.7 vs 73.3	6.7 vs 6.7
					60 min: Vehicle vs 10 mg/kg	t (126) = 17.32	<0.0001	6.7 vs 100.0	6.7 vs 0.0
					60 min: 0.3 mg/kg vs 1 mg/kg	t (126) = 1.191	0.9169	0.0 vs 6.7	0.0 vs 6.7
					60 min: 0.3 mg/kg vs 3 mg/kg	t (126) = 13.03	<0.0001	0.0 vs 73.3	0.0 vs 6.7
					60 min: 0.3 mg/kg vs 10 mg/kg	t (126) = 18.56	<0.0001	0.0 vs 100.0	0.0 vs 0.0
					60 min: 1 mg/kg vs 3 mg/kg	t (126) = 11.84	<0.0001	6.7 vs 73.3	6.7 vs 6.7
					60 min: 1 mg/kg vs 10 mg/kg	t (126) = 17.32	<0.0001	6.7 vs 100.0	6.7 vs 0.0
					60 min: 3 mg/kg vs 10 mg/kg	t (126) = 4.957	0.0056	73.3 vs 100.0	6.7 vs 0.0
					120 min: Vehicle vs 0.3 mg/kg	t (126) = 1.26E-15	>0.9999	0.0 vs 0.0	0.0 vs 0.0
					120 min: Vehicle vs 1 mg/kg	t (126) = 3.16E-15	>0.9999	0.0 vs 0.0	0.0 vs 0.0
					120 min: Vehicle vs 3 mg/kg	t (126) = 1.191	0.9169	0.0 vs 6.7	0.0 vs 6.7
					120 min: Vehicle vs 10 mg/kg	t (126) = 17.32	<0.0001	0.0 vs 93.3	0.0 vs 6.7
					120 min: 0.3 mg/kg vs 1 mg/kg	t (126) = 1.89E-15	>0.9999	0.0 vs 0.0	0.0 vs 0.0
					120 min: 0.3 mg/kg vs 3 mg/kg	t (126) = 1.191	0.9169	0.0 vs 6.7	0.0 vs 6.7
					120 min: 0.3 mg/kg vs 10 mg/kg	t (126) = 17.32	<0.0001	0.0 vs 93.3	0.0 vs 6.7
					120 min: 1 mg/kg vs 3 mg/kg	t (126) = 1.191	0.9169	0.0 vs 6.7	0.0 vs 6.7
					120 min: 1 mg/kg vs 10 mg/kg	t (126) = 17.32	<0.0001	0.0 vs 93.3	0.0 vs 6.7
					120 min: 3 mg/kg vs 10 mg/kg	t (126) = 16.08	<0.0001	6.7 vs 93.0	6.7 vs 6.7
					240 min: Vehicle vs 0.3 mg/kg	t (126) = 1.191	0.9169	0.0 vs 6.7	0.0 vs 6.7
					240 min: Vehicle vs 1 mg/kg	t (126) = 1.191	0.9169	0.0 vs 6.7	0.0 vs 6.7
					240 min: Vehicle vs 3 mg/kg	t (126) = 1.191	0.9169	0.0 vs 6.7	0.0 vs 6.7
					240 min: Vehicle vs 10 mg/kg	t (126) = 4.957	0.0056	0.0 vs 26.7	0.0 vs 12.5
					240 min: 0.3 mg/kg vs 1 mg/kg	t (126) = 2.53E-15	>0.9999	6.7 vs 6.7	6.7 vs 6.7
					240 min: 0.3 mg/kg vs 3 mg/kg	t (126) = 7.58E-15	>0.9999	6.7 vs 6.7	6.7 vs 6.7
					240 min: 0.3 mg/kg vs 10 mg/kg	t (126) = 3.713	0.0718	6.7 vs 26.7	6.7 vs 12.5
					240 min: 1 mg/kg vs 3 mg/kg	t (126) = 1.01E-14	>0.9999	6.7 vs 6.7	6.7 vs 6.7
					240 min: 1 mg/kg vs 10 mg/kg	t (126) = 3.713	0.0718	6.7 vs 26.7	6.7 vs 12.5
					240 min: 3 mg/kg vs 10 mg/kg	t (126) = 3.713	0.0718	6.7 vs 26.7	6.7 vs 12.5
S1b	male n = 5 per dose	Catalepsy time course for (R)-methadone	Dose	Repeated Measures Two-Way ANOVA	Dose x Time Interaction	F (20, 126) = 15.88	<0.0001
		%MPE			Time	F (5, 126) = 47.65	<0.0001
					Dose	F (4, 126) = 140.1	<0.0001
				Tukey's multiple comparison test	0 min: Vehicle vs 0.1 mg/kg	t (126) = 2.65E-15	>0.9999	0.0 vs 0.0	0.0 vs 0.0
					0 min: Vehicle vs 0.3 mg/kg	t (126) = 2.65E-15	>0.9999	0.0 vs 0.0	0.0 vs 0.0
					0 min: Vehicle vs 1 mg/kg	t (126) = 2.65E-15	>0.9999	0.0 vs 0.0	0.0 vs 0.0
					0 min: Vehicle vs 3 mg/kg	t (126) = 2.65E-15	>0.9999	0.0 vs 0.0	0.0 vs 0.0
					0 min: 0.1 mg/kg vs 0.3 mg/kg	t (126) = 0	>0.9999	0.0 vs 0.0	0.0 vs 0.0
					0 min: 0.1 mg/kg vs 1 mg/kg	t (126) = 0	>0.9999	0.0 vs 0.0	0.0 vs 0.0
					0 min: 0.1 mg/kg vs 3 mg/kg	t (126) = 0	>0.9999	0.0 vs 0.0	0.0 vs 0.0
					0 min: 0.3 mg/kg vs 1 mg/kg	t (126) = 0	>0.9999	0.0 vs 0.0	0.0 vs 0.0
					0 min: 0.3 mg/kg vs 3 mg/kg	t (126) = 0	>0.9999	0.0 vs 0.0	0.0 vs 0.0
					0 min: 1 mg/kg vs 3 mg/kg	t (126) = 0	>0.9999	0.0 vs 0.0	0.0 vs 0.0
					15 min: Vehicle vs 0.1 mg/kg	t (126) = 5.30E-15	>0.9999	0.0 vs 0.0	0.0 vs 0.0
					15 min: Vehicle vs 0.3 mg/kg	t (126) = 3.726	0.0701	0.0 vs 20.0	0.0 vs 8.2
					15 min: Vehicle vs 1 mg/kg	t (126) = 8.701	<0.0001	0.0 vs 46.7	0.0 vs 8.2
					15 min: Vehicle vs 3 mg/kg	t (126) = 18.1	<0.0001	0.0 vs 93.0	0.0 vs 6.7
					15 min: 0.1 mg/kg vs 0.3 mg/kg	t (126) = 3.726	0.0701	0.0 vs 20.0	0.0 vs 8.2
					15 min: 0.1 mg/kg vs 1 mg/kg	t (126) = 8.701	<0.0001	0.0 vs 46.7	0.0 vs 8.2
					15 min: 0.1 mg/kg vs 3 mg/kg	t (126) = 18.1	<0.0001	0.0 vs 93.0	0.0 vs 6.7
					15 min: 0.3 mg/kg vs 1 mg/kg	t (126) = 4.975	0.0054	20.0 vs 46.7	8.2 vs 8.2
					15 min: 0.3 mg/kg vs 3 mg/kg	t (126) = 14.21	<0.0001	20.0 vs 93.0	8.2 vs 6.7
					15 min: 1 mg/kg vs 3 mg/kg	t (126) = 9.01	<0.0001	46.7 vs 93.0	8.2 vs 6.7
					30 min: Vehicle vs 0.1 mg/kg	t (126) = 2.478	0.4061	0.0 vs 13.3	0.0 vs 8.2
					30 min: Vehicle vs 0.3 mg/kg	t (126) = 4.975	0.0054	0.0 vs 26.7	0.0 vs 6.7
					30 min: Vehicle vs 1 mg/kg	t (126) = 12.43	<0.0001	0.0 vs 66.7	0.0 vs 0.0
					30 min: Vehicle vs 3 mg/kg	t (126) = 19.46	<0.0001	0.0 vs 100.0	0.0 vs 0.0
					30 min: 0.1 mg/kg vs 0.3 mg/kg	t (126) = 2.497	0.3983	13.3 vs 26.7	8.2 vs 6.7
					30 min: 0.1 mg/kg vs 1 mg/kg	t (126) = 9.95	<0.0001	13.3 vs 66.7	8.2 vs 0.0
					30 min: 0.1 mg/kg vs 3 mg/kg	t (126) = 16.87	<0.0001	13.3 vs 100.0	8.2 vs 0.0
					30 min: 0.3 mg/kg vs 1 mg/kg	t (126) = 7.453	<0.0001	26.7 vs 66.7	6.7 vs 0.0
					30 min: 0.3 mg/kg vs 3 mg/kg	t (126) = 14.26	<0.0001	26.7 vs 100.0	6.7 vs 0.0
					30 min: 1 mg/kg vs 3 mg/kg	t (126) = 6.48	0.0001	66.7 vs 100.0	0.0 vs 0.0
					60 min: Vehicle vs 0.1 mg/kg	t (126) = 1.248	0.9028	6.7 vs 0.0	6.7 vs 0.0
					60 min: Vehicle vs 0.3 mg/kg	t (126) = 2.65E-15	>0.9999	6.7 vs 6.7	6.7 vs 6.7
					60 min: Vehicle vs 1 mg/kg	t (126) = 4.956	0.0056	6.7 vs 33.3	6.7 vs 0.0
					60 min: Vehicle vs 3 mg/kg	t (126) = 18.16	<0.0001	6.7 vs 100.0	6.7 vs 0.0
					60 min: 0.1 mg/kg vs 0.3 mg/kg	t (126) = 1.248	0.9028	0.0 vs 6.7	0.0 vs 6.7
					60 min: 0.1 mg/kg vs 1 mg/kg	t (126) = 6.205	0.0002	0.0 vs 33.3	0.0 vs 0.0
					60 min: 0.1 mg/kg vs 3 mg/kg	t (126) = 19.46	<0.0001	0.0 vs 100.0	0.0 vs 0.0
					60 min: 0.3 mg/kg vs 1 mg/kg	t (126) = 4.956	0.0056	6.7 vs 33.3	6.7 vs 0.0
					60 min: 0.3 mg/kg vs 3 mg/kg	t (126) = 18.16	<0.0001	6.7 vs 100.0	6.7 vs 0.0
					60 min: 1 mg/kg vs 3 mg/kg	t (126) = 12.98	<0.0001	33.3 vs 100.0	0.0 vs 0.0
					120 min: Vehicle vs 0.1 mg/kg	t (126) = 3.31E-15	>0.9999	0.0 vs 0.0	0.0 vs 0.0
					120 min: Vehicle vs 0.3 mg/kg	t (126) = 5.30E-15	>0.9999	0.0 vs 0.0	0.0 vs 0.0
					120 min: Vehicle vs 1 mg/kg	t (126) = 2.478	0.4061	0.0 vs 13.3	0.0 vs 8.2
					120 min: Vehicle vs 3 mg/kg	t (126) = 11.68	<0.0001	0.0 vs 60.0	0.0 vs 12.5
					120 min: 0.1 mg/kg vs 0.3 mg/kg	t (126) = 1.99E-15	>0.9999	0.0 vs 0.0	0.0 vs 0.0
					120 min: 0.1 mg/kg vs 1 mg/kg	t (126) = 2.478	0.4061	0.0 vs 13.3	0.0 vs 8.2
					120 min: 0.1 mg/kg vs 3 mg/kg	t (126) = 11.68	<0.0001	0.0 vs 60.0	0.0 vs 12.5
					120 min: 0.3 mg/kg vs 1 mg/kg	t (126) = 2.478	0.4061	0.0 vs 13.3	0.0 vs 8.2
					120 min: 0.3 mg/kg vs 3 mg/kg	t (126) = 11.68	<0.0001	0.0 vs 60.0	0.0 vs 12.5
					120 min: 1 mg/kg vs 3 mg/kg	t (126) = 9.088	<0.0001	13.3 vs 60.0	8.2 vs 12.5
					240 min: Vehicle vs 0.1 mg/kg	t (126) = 1.248	0.9028	0.0 vs 6.7	0.0 vs 6.7
					240 min: Vehicle vs 0.3 mg/kg	t (126) = 1.248	0.9028	0.0 vs 6.7	0.0 vs 6.7
					240 min: Vehicle vs 1 mg/kg	t (126) = 1.248	0.9028	0.0 vs 6.7	0.0 vs 6.7
					240 min: Vehicle vs 3 mg/kg	t (126) = 1.304	0.8879	0.0 vs 6.7	0.0 vs 6.7
					240 min: 0.1 mg/kg vs 0.3 mg/kg	t (126) = 1.46E-14	>0.9999	6.7 vs 6.7	6.7 vs 6.7
					240 min: 0.1 mg/kg vs 1 mg/kg	t (126) = 1.06E-14	>0.9999	6.7 vs 6.7	6.7 vs 6.7
					240 min: 0.1 mg/kg vs 3 mg/kg	t (126) = 1.38E-14	>0.9999	6.7 vs 6.7	6.7 vs 6.7
					240 min: 0.3 mg/kg vs 1 mg/kg	t (126) = 3.97E-15	>0.9999	6.7 vs 6.7	6.7 vs 6.7
					240 min: 0.3 mg/kg vs 3 mg/kg	t (126) = 1.38E-15	>0.9999	6.7 vs 6.7	6.7 vs 6.7
					240 min: 1 mg/kg vs 3 mg/kg	t (126) = 2.77E-15	>0.9999	6.7 vs 6.7	6.7 vs 6.7
S1c	male n = 5 per dose	Catalepsy time course for (S)-methadone	Dose	Repeated Measures Two-Way ANOVA	Dose x Time Interaction	F (20, 126) = 6.666	<0.0001
		%MPE			Time	F (5, 126) = 16.37	<0.0001
					Dose	F (4, 126) = 71.47	<0.0001
				Tukey's multiple comparison test	0 min: Vehicle vs. 3 mg/kg	t (126) = 0	>0.9999	0.0 vs 0.0	0.0 vs 0.0
					0 min: Vehicle vs. 10 mg/kg	t (126) = 1.21E-15	>0.9999	0.0 vs 0.0	0.0 vs 0.0
					0 min: Vehicle vs. 30 mg/kg	t (126) = 2.41E-15	>0.9999	0.0 vs 0.0	0.0 vs 0.0
					0 min: Vehicle vs. 100 mg/kg	t (126) = 0	>0.9999	0.0 vs 0.0	0.0 vs 0.0
					0 min: 3 mg/kg vs. 10 mg/kg	t (126) = 1.21E-15	>0.9999	0.0 vs 0.0	0.0 vs 0.0
					0 min: 3 mg/kg vs. 30 mg/kg	t (126) = 2.41E-15	>0.9999	0.0 vs 0.0	0.0 vs 0.0
					0 min: 3 mg/kg vs. 100 mg/kg	t (126) = 0	>0.9999	0.0 vs 0.0	0.0 vs 0.0
					0 min: 10 mg/kg vs. 30 mg/kg	t (126) = 1.21E-15	>0.9999	0.0 vs 0.0	0.0 vs 0.0
					0 min: 10 mg/kg vs. 100 mg/kg	t (126) = 1.26E-15	>0.9999	0.0 vs 0.0	0.0 vs 0.0
					0 min: 30 mg/kg vs. 100 mg/kg	t (126) = 2.52E-15	>0.9999	0.0 vs 0.0	0.0 vs 0.0
					15 min: Vehicle vs. 3 mg/kg	t (126) = 1.21E-15	>0.9999	0.0 vs 0.0	0.0 vs 0.0
					15 min: Vehicle vs. 10 mg/kg	t (126) = 4.527	0.0147	0.0 vs 26.7	0.0 vs 6.7
					15 min: Vehicle vs. 30 mg/kg	t (126) = 4.527	0.0147	0.0 vs 26.7	0.0 vs 12.5
					15 min: Vehicle vs. 100 mg/kg	t (126) = 7.084	<0.0001	0.0 vs 40.0	0.0 vs 6.7
					15 min: 3 mg/kg vs. 10 mg/kg	t (126) = 4.527	0.0147	0.0 vs 26.7	0.0 vs 6.7
					15 min: 3 mg/kg vs. 30 mg/kg	t (126) = 4.527	0.0147	0.0 vs 26.7	0.0 vs 12.5
					15 min: 3 mg/kg vs. 100 mg/kg	t (126) = 7.084	<0.0001	0.0 vs 40.0	0.0 vs 6.7
					15 min: 10 mg/kg vs. 30 mg/kg	t (126) = 0	>0.9999	26.7 vs 26.7	6.7 vs 12.5
					15 min: 10 mg/kg vs. 100 mg/kg	t (126) = 2.355	0.459	26.7 vs 40.0	6.7 vs 6.7
					15 min: 30 mg/kg vs. 100 mg/kg	t (126) = 2.355	0.459	26.7 vs 40.0	12.5 vs 6.7
					30 min: Vehicle vs. 3 mg/kg	t (126) = 1.136	0.9292	0.0 vs 6.7	0.0 vs 6.7
					30 min: Vehicle vs. 10 mg/kg	t (126) = 2.255	0.5037	0.0 vs 13.3	0.0 vs 8.2
					30 min: Vehicle vs. 30 mg/kg	t (126) = 6.782	<0.0001	0.0 vs 40.0	0.0 vs 6.7
					30 min: Vehicle vs. 100 mg/kg	t (126) = 12.98	<0.0001	0.0 vs 73.3	0.0 vs 6.7
					30 min: 3 mg/kg vs. 10 mg/kg	t (126) = 1.119	0.9327	6.7 vs 13.3	6.7 vs 8.2
					30 min: 3 mg/kg vs. 30 mg/kg	t (126) = 5.646	0.001	6.7 vs 40.0	6.7 vs 6.7
					30 min: 3 mg/kg vs. 100 mg/kg	t (126) = 11.79	<0.0001	6.7 vs 73.3	6.7 vs 6.7
					30 min: 10 mg/kg vs. 30 mg/kg	t (126) = 4.527	0.0147	13.3 vs 40.0	8.2 vs 6.7
					30 min: 10 mg/kg vs. 100 mg/kg	t (126) = 10.63	<0.0001	13.3 vs 73.3	8.2 vs 6.7
					30 min: 30 mg/kg vs. 100 mg/kg	t (126) = 5.897	0.0005	40.0 vs 73.3	6.7 vs 6.7
					60 min: Vehicle vs. 3 mg/kg	t (126) = 0	>0.9999	6.7 vs 6.7	6.7 vs 6.7
					60 min: Vehicle vs. 10 mg/kg	t (126) = 0	>0.9999	6.7 vs 6.7	6.7 vs 6.7
					60 min: Vehicle vs. 30 mg/kg	t (126) = 3.391	0.1226	6.7 vs 26.7	6.7 vs 6.7
					60 min: Vehicle vs. 100 mg/kg	t (126) = 12.98	<0.0001	6.7 vs 80.0	6.7 vs 8.2
					60 min: 3 mg/kg vs. 10 mg/kg	t (126) = 0	>0.9999	6.7 vs 6.7	6.7 vs 6.7
					60 min: 3 mg/kg vs. 30 mg/kg	t (126) = 3.391	0.1226	6.7 vs 26.7	6.7 vs 6.7
					60 min: 3 mg/kg vs. 100 mg/kg	t (126) = 12.98	<0.0001	6.7 vs 80.0	6.7 vs 8.2
					60 min: 10 mg/kg vs. 30 mg/kg	t (126) = 3.391	0.1226	6.7 vs 26.7	6.7 vs 6.7
					60 min: 10 mg/kg vs. 100 mg/kg	t (126) = 12.98	<0.0001	6.7 vs 80.0	6.7 vs 8.2
					60 min: 30 mg/kg vs. 100 mg/kg	t (126) = 9.439	<0.0001	26.7 vs 80.0	6.7 vs 8.2
					120 min: Vehicle vs. 3 mg/kg	t (126) = 1.21E-15	>0.9999	0.0 vs 0.0	0.0 vs 0.0
					120 min: Vehicle vs. 10 mg/kg	t (126) = 3.01E-15	>0.9999	0.0 vs 0.0	0.0 vs 0.0
					120 min: Vehicle vs. 30 mg/kg	t (126) = 1.136	0.9292	0.0 vs 6.7	0.0 vs 6.7
					120 min: Vehicle vs. 100 mg/kg	t (126) = 11.81	<0.0001	0.0 vs 66.7	0.0 vs 10.5
					120 min: 3 mg/kg vs. 10 mg/kg	t (126) = 1.81E-15	>0.9999	0.0 vs 0.0	0.0 vs 0.0
					120 min: 3 mg/kg vs. 30 mg/kg	t (126) = 1.136	0.9292	0.0 vs 6.7	0.0 vs 6.7
					120 min: 3 mg/kg vs. 100 mg/kg	t (126) = 11.81	<0.0001	0.0 vs 66.7	0.0 vs 10.5
					120 min: 10 mg/kg vs. 30 mg/kg	t (126) = 1.136	0.9292	0.0 vs 6.7	0.0 vs 6.7
					120 min: 10 mg/kg vs. 100 mg/kg	t (126) = 11.81	<0.0001	0.0 vs 66.7	0.0 vs 10.5
					120 min: 30 mg/kg vs. 100 mg/kg	t (126) = 10.63	<0.0001	6.7 vs 66.7	6.7 vs 10.5
					240 min: Vehicle vs. 3 mg/kg	t (126) = 1.136	0.9292	6.7 vs 0.0	6.7 vs 0.0
					240 min: Vehicle vs. 10 mg/kg	t (126) = 1.136	0.9292	6.7 vs 0.0	6.7 vs 0.0
					240 min: Vehicle vs. 30 mg/kg	t (126) = 1.136	0.9292	6.7 vs 0.0	6.7 vs 0.0
					240 min: Vehicle vs. 100 mg/kg	t (126) = 3.542	0.0961	6.7 vs 26.7	6.7 vs 6.7
					240 min: 3 mg/kg vs. 10 mg/kg	t (126) = 3.61E-15	>0.9999	0.0 vs 0.0	0.0 vs 0.0
					240 min: 3 mg/kg vs. 30 mg/kg	t (126) = 6.02E-15	>0.9999	0.0 vs 0.0	0.0 vs 0.0
					240 min: 3 mg/kg vs. 100 mg/kg	t (126) = 4.728	0.0095	0.0 vs 26.7	0.0 vs 6.7
					240 min: 10 mg/kg vs. 30 mg/kg	t (126) = 2.41E-15	>0.9999	0.0 vs 0.0	0.0 vs 0.0
					240 min: 10 mg/kg vs. 100 mg/kg	t (126) = 4.728	0.0095	0.0 vs 26.7	0.0 vs 6.7
					240 min: 30 mg/kg vs. 100 mg/kg	t (126) = 4.728	0.0095	0.0 vs 26.7	0.0 vs 6.7
S1d	male n = 5 per dose	Hot Plate latency time course for (R,S)-methadone	Dose	Repeated Measures Two-Way ANOVA	Dose x Time Interaction	F (20, 120) = 18.10	<0.0001
		%MPE			Time	F (5, 120) = 67.36	<0.0001
					Dose	F (4, 120) = 216.7	<0.0001
				Tukey's multiple comparison test	0 min: Vehicle vs 0.3 mg/kg	t (120) = 0	>0.9999	0.0 vs 0.0	0.0 vs 0.0
					0 min: Vehicle vs 1 mg/kg	t (120) = 0	>0.9999	0.0 vs 0.0	0.0 vs 0.0
					0 min: Vehicle vs 3 mg/kg	t (120) = 0	>0.9999	0.0 vs 0.0	0.0 vs 0.0
					0 min: Vehicle vs 10 mg/kg	t (120) = 0	>0.9999	0.0 vs 0.0	0.0 vs 0.0
					0 min: 0.3 mg/kg vs 1 mg/kg	t (120) = 0	>0.9999	0.0 vs 0.0	0.0 vs 0.0
					0 min: 0.3 mg/kg vs 3 mg/kg	t (120) = 0	>0.9999	0.0 vs 0.0	0.0 vs 0.0
					0 min: 0.3 mg/kg vs 10 mg/kg	t (120) = 0	>0.9999	0.0 vs 0.0	0.0 vs 0.0
					0 min: 1 mg/kg vs 3 mg/kg	t (120) = 0	>0.9999	0.0 vs 0.0	0.0 vs 0.0
					0 min: 1 mg/kg vs 10 mg/kg	t (120) = 0	>0.9999	0.0 vs 0.0	0.0 vs 0.0
					0 min: 3 mg/kg vs 10 mg/kg	t (120) = 0	>0.9999	0.0 vs 0.0	0.0 vs 0.0
					15 min: Vehicle vs 0.3 mg/kg	t (120) = 3.266	0.1489	-6.0 vs 12.7	4.2 vs 4.9
					15 min: Vehicle vs 1 mg/kg	t (120) = 6.253	0.0002	-6.0 vs 29.8	4.2 vs 2.6
					15 min: Vehicle vs 3 mg/kg	t (120) = 16.94	<0.0001	-6.0 vs 91.0	4.2 vs 9.0
					15 min: Vehicle vs 10 mg/kg	t (120) = 18.52	<0.0001	-6.0 vs 100.0	4.2 vs 0.0
					15 min: 0.3 mg/kg vs 1 mg/kg	t (120) = 2.987	0.2217	12.7 vs 29.8	4.9 vs 2.6
					15 min: 0.3 mg/kg vs 3 mg/kg	t (120) = 13.68	<0.0001	12.7 vs 91.0	4.9 vs 9.0
					15 min: 0.3 mg/kg vs 10 mg/kg	t (120) = 15.25	<0.0001	12.7 vs 100.0	4.9 vs 0.0
					15 min: 1 mg/kg vs 3 mg/kg	t (120) = 10.69	<0.0001	29.8 vs 91.0	2.6 vs 9.0
					15 min: 1 mg/kg vs 10 mg/kg	t (120) = 12.26	<0.0001	29.8 vs 100.0	2.6 vs 0.0
					15 min: 3 mg/kg vs 10 mg/kg	t (120) = 1.572	0.8001	91.0 vs 100.0	9.0 vs 0.0
					30 min: Vehicle vs 0.3 mg/kg	t (120) = 2.638	0.3418	0.8 vs 15.9	1.1 vs 11.8
					30 min: Vehicle vs 1 mg/kg	t (120) = 11.51	<0.0001	0.8 vs 66.7	1.1 vs 6.6
					30 min: Vehicle vs 3 mg/kg	t (120) = 17.33	<0.0001	0.8 vs 100.0	1.1 vs 0.0
					30 min: Vehicle vs 10 mg/kg	t (120) = 17.33	<0.0001	0.8 vs 100.0	1.1 vs 0.0
					30 min: 0.3 mg/kg vs 1 mg/kg	t (120) = 8.874	<0.0001	15.9 vs 66.7	11.8 vs 6.6
					30 min: 0.3 mg/kg vs 3 mg/kg	t (120) = 14.69	<0.0001	15.9 vs 100.0	11.8 vs 0.0
					30 min: 0.3 mg/kg vs 10 mg/kg	t (120) = 14.69	<0.0001	15.9 vs 100.0	11.8 vs 0.0
					30 min: 1 mg/kg vs 3 mg/kg	t (120) = 5.817	0.0007	66.7 vs 100.0	6.6 vs 0.0
					30 min: 1 mg/kg vs 10 mg/kg	t (120) = 5.817	0.0007	66.7 vs 100.0	6.6 vs 0.0
					30 min: 3 mg/kg vs 10 mg/kg	t (120) = 0	>0.9999	100.0 vs 100.0	0.0 vs 0.0
					60 min: Vehicle vs 0.3 mg/kg	t (120) = 0.1677	>0.9999	-0.34 vs -1.3	1.4 vs 4.6
					60 min: Vehicle vs 1 mg/kg	t (120) = 1.177	0.92	-0.34 vs 6.4	1.4 vs 4.7
					60 min: Vehicle vs 3 mg/kg	t (120) = 17.53	<0.0001	-0.34 vs 100.0	1.4 vs 0.0
					60 min: Vehicle vs 10 mg/kg	t (120) = 17.53	<0.0001	-0.34 vs 100.0	1.4 vs 0.0
					60 min: 0.3 mg/kg vs 1 mg/kg	t (120) = 1.345	0.8761	-1.3 vs 6.4	4.6 vs 4.7
					60 min: 0.3 mg/kg vs 3 mg/kg	t (120) = 17.69	<0.0001	-1.3 vs 100.0	4.6 vs 0.0
					60 min: 0.3 mg/kg vs 10 mg/kg	t (120) = 17.69	<0.0001	-1.3 vs 100.0	4.6 vs 0.0
					60 min: 1 mg/kg vs 3 mg/kg	t (120) = 16.35	<0.0001	6.7 vs 100.0	4.7 vs 0.0
					60 min: 1 mg/kg vs 10 mg/kg	t (120) = 16.35	<0.0001	6.7 vs 100.0	4.7 vs 0.0
					60 min: 3 mg/kg vs 10 mg/kg	t (120) = 0	>0.9999	100.0 vs 100.0	0.0 vs 0.0
					120 min: Vehicle vs 0.3 mg/kg	t (120) = 0.8035	0.9794	3.4 vs -1.2	4.5 vs 2.6
					120 min: Vehicle vs 1 mg/kg	t (120) = 0.3668	0.999	3.4 vs 5.5	4.5 vs 6.2
					120 min: Vehicle vs 3 mg/kg	t (120) = 10.76	<0.0001	3.4 vs 65.0	4.5 vs 14.6
					120 min: Vehicle vs 10 mg/kg	t (120) = 16.87	<0.0001	3.4 vs 100.0	4.5 vs 8.0
					120 min: 0.3 mg/kg vs 1 mg/kg	t (120) = 1.17	0.9216	-1.2 vs 5.5	2.6 vs 6.2
					120 min: 0.3 mg/kg vs 3 mg/kg	t (120) = 11.56	<0.0001	-1.2 vs 65.0	2.6 vs 14.6
					120 min: 0.3 mg/kg vs 10 mg/kg	t (120) = 17.68	<0.0001	-1.2 vs 100.0	2.6 vs 8.0
					120 min: 1 mg/kg vs 3 mg/kg	t (120) = 10.39	<0.0001	5.5 vs 65.0	6.2 vs 14.6
					120 min: 1 mg/kg vs 10 mg/kg	t (120) = 16.51	<0.0001	5.5 vs 100.0	6.2 vs 8.0
					120 min: 3 mg/kg vs 10 mg/kg	t (120) = 6.114	0.0003	65.0 vs 100.0	14.6 vs 8.0
					240 min: Vehicle vs 0.3 mg/kg	t (120) = 0.1048	>0.9999	3.0 vs 3.6	3.5 vs 3.1
					240 min: Vehicle vs 1 mg/kg	t (120) = 0.4367	0.998	3.0 vs 0.5	3.5 vs 2.9
					240 min: Vehicle vs 3 mg/kg	t (120) = 0.3494	0.9992	3.0 vs 5.0	3.5 vs 8.0
					240 min: Vehicle vs 10 mg/kg	t (120) = 10.04	<0.0001	3.0 vs 60.5	3.5 vs 13.7
					240 min: 0.3 mg/kg vs 1 mg/kg	t (120) = 0.5415	0.9954	3.6 vs 0.5	3.1 vs 2.9
					240 min: 0.3 mg/kg vs 3 mg/kg	t (120) = 0.2446	0.9998	3.6 vs 5.0	3.1 vs 8.0
					240 min: 0.3 mg/kg vs 10 mg/kg	t (120) = 9.939	<0.0001	3.6 vs 60.5	3.1 vs 13.7
					240 min: 1 mg/kg vs 3 mg/kg	t (120) = 0.7861	0.981	0.5 vs 5.0	2.9 vs 8.0
					240 min: 1 mg/kg vs 10 mg/kg	t (120) = 10.48	<0.0001	0.5 vs 60.5	2.9 vs 13.7
					240 min: 3 mg/kg vs 10 mg/kg	t (120) = 9.695	<0.0001	5.0 vs 60.5	8.0 vs 13.7
S1e	male n = 5 per dose	Hot Plate latency time course for (R)-methadone	Dose	Repeated Measures Two-Way ANOVA	Dose x Time Interaction	F (20, 120) = 17.62	<0.0001
		%MPE			Time	F (5, 120) = 77.62	<0.0001
					Dose	F (4, 120) = 176.3	<0.0001
				Tukey's multiple comparison test	0 min: Vehicle vs 0.1 mg/kg	t (120) = 0	>0.9999	0.0 vs 0.0	0.0 vs 0.0
					0 min: Vehicle vs 0.3 mg/kg	t (120) = 0	>0.9999	0.0 vs 0.0	0.0 vs 0.0
					0 min: Vehicle vs 1 mg/kg	t (120) = 0	>0.9999	0.0 vs 0.0	0.0 vs 0.0
					0 min: Vehicle vs 3 mg/kg	t (120) = 0	>0.9999	0.0 vs 0.0	0.0 vs 0.0
					0 min: 0.1 mg/kg vs 0.3 mg/kg	t (120) = 0	>0.9999	0.0 vs 0.0	0.0 vs 0.0
					0 min: 0.1 mg/kg vs 1 mg/kg	t (120) = 0	>0.9999	0.0 vs 0.0	0.0 vs 0.0
					0 min: 0.1 mg/kg vs 3 mg/kg	t (120) = 0	>0.9999	0.0 vs 0.0	0.0 vs 0.0
					0 min: 0.3 mg/kg vs 1 mg/kg	t (120) = 0	>0.9999	0.0 vs 0.0	0.0 vs 0.0
					0 min: 0.3 mg/kg vs 3 mg/kg	t (120) = 0	>0.9999	0.0 vs 0.0	0.0 vs 0.0
					0 min: 1 mg/kg vs 3 mg/kg	t (120) = 0	>0.9999	0.0 vs 0.0	0.0 vs 0.0
					15 min: Vehicle vs 0.1 mg/kg	t (120) = 2.505	0.3951	6.6 vs 20.3	5.3 vs 7.0
					15 min: Vehicle vs 0.3 mg/kg	t (120) = 6.528	<0.0001	6.6 vs 42.3	5.3 vs 4.3
					15 min: Vehicle vs 1 mg/kg	t (120) = 15.2	<0.0001	6.6 vs 89.7	5.3 vs 9.0
					15 min: Vehicle vs 3 mg/kg	t (120) = 17.08	<0.0001	6.6 vs 100.0	5.3 vs 0.0
					15 min: 0.1 mg/kg vs 0.3 mg/kg	t (120) = 4.023	0.041	20.3 vs 42.3	7.0 vs 4.3
					15 min: 0.1 mg/kg vs 1 mg/kg	t (120) = 12.69	<0.0001	20.7 vs 89.7	7.0 vs 9.0
					15 min: 0.1 mg/kg vs 3 mg/kg	t (120) = 14.57	<0.0001	20.7 vs 100.0	7.0 vs 0.0
					15 min: 0.3 mg/kg vs 1 mg/kg	t (120) = 8.667	<0.0001	42.3 vs 89.7	4.3 vs 9.0
					15 min: 0.3 mg/kg vs 3 mg/kg	t (120) = 10.55	<0.0001	42.3 vs 100.0	4.3 vs 0.0
					15 min: 1 mg/kg vs 3 mg/kg	t (120) = 1.883	0.672	89.7 vs 100.0	9.0 vs 0.0
					30 min: Vehicle vs 0.1 mg/kg	t (120) = 1.243	0.904	6.6 vs 13.4	3.9 vs 5.6
					30 min: Vehicle vs 0.3 mg/kg	t (120) = 2.469	0.4104	6.6 vs 20.1	3.9 vs 2.6
					30 min: Vehicle vs 1 mg/kg	t (120) = 17.08	<0.0001	6.6 vs 100.0	3.9 vs 0.0
					30 min: Vehicle vs 3 mg/kg	t (120) = 17.08	<0.0001	6.6 vs 100.0	3.9 vs 0.0
					30 min: 0.1 mg/kg vs 0.3 mg/kg	t (120) = 1.225	0.9086	13.4 vs 20.1	5.6 vs 2.6
					30 min: 0.1 mg/kg vs 1 mg/kg	t (120) = 15.84	<0.0001	13.4 vs 100.0	5.6 vs 0.0
					30 min: 0.1 mg/kg vs 3 mg/kg	t (120) = 15.84	<0.0001	13.4 vs 100.0	5.6 vs 0.0
					30 min: 0.3 mg/kg vs 1 mg/kg	t (120) = 14.61	<0.0001	20.1 vs 100.0	2.6 vs 0.0
					30 min: 0.3 mg/kg vs 3 mg/kg	t (120) = 14.61	<0.0001	20.1 vs 100.0	2.6 vs 0.0
					30 min: 1 mg/kg vs 3 mg/kg	t (120) = 0	>0.9999	100.0 vs 100.0	0.0 vs 0.0
					60 min: Vehicle vs 0.1 mg/kg	t (120) = 0.3108	0.9995	1.2 vs 2.9	4.7 vs 5.1
					60 min: Vehicle vs 0.3 mg/kg	t (120) = 1.408	0.8569	1.2 vs 8.9	4.7 vs 1.8
					60 min: Vehicle vs 1 mg/kg	t (120) = 12.71	<0.0001	1.2 vs 70.7	4.7 vs 0.0
					60 min: Vehicle vs 3 mg/kg	t (120) = 18.07	<0.0001	1.2 vs 100.0	4.7 vs 0.0
					60 min: 0.1 mg/kg vs 0.3 mg/kg	t (120) = 1.097	0.9371	2.9 vs 8.9	5.1 vs 1.8
					60 min: 0.1 mg/kg vs 1 mg/kg	t (120) = 12.4	<0.0001	2.9 vs 70.7	5.1 vs 0.0
					60 min: 0.1 mg/kg vs 3 mg/kg	t (120) = 17.76	<0.0001	2.9 vs 100.0	5.1 vs 0.0
					60 min: 0.3 mg/kg vs 1 mg/kg	t (120) = 11.3	<0.0001	8.9 vs 70.7	1.8 vs 0.0
					60 min: 0.3 mg/kg vs 3 mg/kg	t (120) = 16.66	<0.0001	8.9 vs 100.0	1.8 vs 0.0
					60 min: 1 mg/kg vs 3 mg/kg	t (120) = 5.358	0.0022	70.7 vs 100.0	0.0 vs 0.0
					120 min: Vehicle vs 0.1 mg/kg	t (120) = 1.664	0.7647	-5.0 vs 4.1	5.6 vs 4.8
					120 min: Vehicle vs 0.3 mg/kg	t (120) = 0.6217	0.9922	-5.0 vs -1.6	5.6 vs 4.0
					120 min: Vehicle vs 1 mg/kg	t (120) = 2.633	0.3436	-5.0 vs 9.4	5.6 vs 14.6
					120 min: Vehicle vs 3 mg/kg	t (120) = 17.61	<0.0001	-5.0 vs 91.6	5.6 vs 6.6
					120 min: 0.1 mg/kg vs 0.3 mg/kg	t (120) = 1.042	0.9474	4.1 vs -1.6	4.8 vs 4.0
					120 min: 0.1 mg/kg vs 1 mg/kg	t (120) = 0.9691	0.9593	4.1 vs 9.4	4.8 vs 14.6
					120 min: 0.1 mg/kg vs 3 mg/kg	t (120) = 15.94	<0.0001	4.1 vs 91.3	4.8 vs 6.6
					120 min: 0.3 mg/kg vs 1 mg/kg	t (120) = 2.011	0.6146	-1.6 vs 9.4	4.0 vs 14.6
					120 min: 0.3 mg/kg vs 3 mg/kg	t (120) = 16.99	<0.0001	-1.6 vs 91.3	4.0 vs 6.6
					120 min: 1 mg/kg vs 3 mg/kg	t (120) = 14.98	<0.0001	9.4 vs 91.3	14.6 vs 6.6
					240 min: Vehicle vs 0.1 mg/kg	t (120) = 1.061	0.9441	-2.4 vs 3.4	6.8 vs 4.2
					240 min: Vehicle vs 0.3 mg/kg	t (120) = 0.6583	0.9903	-2.4 vs 1.2	6.8 vs 1.5
					240 min: Vehicle vs 1 mg/kg	t (120) = 0.896	0.9693	-2.4 vs 2.5	6.8 vs 8.0
					240 min: Vehicle vs 3 mg/kg	t (120) = 6.254	0.0002	-2.4 vs 31.8	6.8 vs 12.6
					240 min: 0.1 mg/kg vs 0.3 mg/kg	t (120) = 0.4023	0.9985	3.4 vs 1.2	4.2 vs 1.5
					240 min: 0.1 mg/kg vs 1 mg/kg	t (120) = 0.1646	>0.9999	3.4 vs 2.5	4.2 vs 8.0
					240 min: 0.1 mg/kg vs 3 mg/kg	t (120) = 5.193	0.0033	3.4 vs 31.8	4.2 vs 12.6
					240 min: 0.3 mg/kg vs 1 mg/kg	t (120) = 0.2377	0.9998	1.2 vs 2.5	1.5 vs 8.0
					240 min: 0.3 mg/kg vs 3 mg/kg	t (120) = 5.595	0.0012	1.2 vs 31.8	1.5 vs 12.6
					240 min: 1 mg/kg vs 3 mg/kg	t (120) = 5.358	0.0022	2.5 vs 31.8	8.0 vs 12.6
S1f	male n = 5 per dose	Hot Plate latency time course for (S)-methadone	Dose	Repeated Measures Two-Way ANOVA	Dose x Time Interaction	F (20, 120) = 10.90	<0.0001
		%MPE			Time	F (5, 120) = 55.04	<0.0001
					Dose	F (4, 120) = 144.4	<0.0001
				Tukey's multiple comparison test	0 min: Vehicle vs. 3 mg/kg	t (120) = 0	>0.9999	0.0 vs 0.0	0.0 vs 0.0
					0 min: Vehicle vs. 10 mg/kg	t (120) = 0	>0.9999	0.0 vs 0.0	0.0 vs 0.0
					0 min: Vehicle vs. 30 mg/kg	t (120) = 0	>0.9999	0.0 vs 0.0	0.0 vs 0.0
					0 min: Vehicle vs. 100 mg/kg	t (120) = 0	>0.9999	0.0 vs 0.0	0.0 vs 0.0
					0 min: 3 mg/kg vs. 10 mg/kg	t (120) = 0	>0.9999	0.0 vs 0.0	0.0 vs 0.0
					0 min: 3 mg/kg vs. 30 mg/kg	t (120) = 0	>0.9999	0.0 vs 0.0	0.0 vs 0.0
					0 min: 3 mg/kg vs. 100 mg/kg	t (120) = 0	>0.9999	0.0 vs 0.0	0.0 vs 0.0
					0 min: 10 mg/kg vs. 30 mg/kg	t (120) = 0	>0.9999	0.0 vs 0.0	0.0 vs 0.0
					0 min: 10 mg/kg vs. 100 mg/kg	t (120) = 0	>0.9999	0.0 vs 0.0	0.0 vs 0.0
					0 min: 30 mg/kg vs. 100 mg/kg	t (120) = 0	>0.9999	0.0 vs 0.0	0.0 vs 0.0
					15 min: Vehicle vs. 3 mg/kg	t (120) = 0.2885	0.9996	10.5 vs 12.2	3.1 vs 5.9
					15 min: Vehicle vs. 10 mg/kg	t (120) = 2.885	0.2534	10.5 vs 27.5	3.1 vs 7.2
					15 min: Vehicle vs. 30 mg/kg	t (120) = 11.8	<0.0001	10.5 vs 80.0	3.1 vs 11.6
					15 min: Vehicle vs. 100 mg/kg	t (120) = 14.16	<0.0001	10.5 vs 93.9	3.1 vs 4.0
					15 min: 3 mg/kg vs. 10 mg/kg	t (120) = 2.597	0.3578	12.2 vs 27.5	5.9 vs 7.2
					15 min: 3 mg/kg vs. 30 mg/kg	t (120) = 11.51	<0.0001	12.2 vs 80.0	5.9 vs 11.6
					15 min: 3 mg/kg vs. 100 mg/kg	t (120) = 13.87	<0.0001	12.2 vs 93.9	5.9 vs 4.0
					15 min: 10 mg/kg vs. 30 mg/kg	t (120) = 8.911	<0.0001	27.5 vs 80.0	7.2 vs 11.6
					15 min: 10 mg/kg vs. 100 mg/kg	t (120) = 11.27	<0.0001	27.5 vs 93.9	7.2 vs 4.0
					15 min: 30 mg/kg vs. 100 mg/kg	t (120) = 2.359	0.4574	80.0 vs 93.9	11.6 vs 4.0
					30 min: Vehicle vs. 3 mg/kg	t (120) = 0.628	0.9918	9.1 vs 12.8	4.7 vs 4.8
					30 min: Vehicle vs. 10 mg/kg	t (120) = 4.82	0.0078	9.1 vs 37.5	4.7 vs 6.7
					30 min: Vehicle vs. 30 mg/kg	t (120) = 11.69	<0.0001	9.1 vs 78.0	4.7 vs 9.8
					30 min: Vehicle vs. 100 mg/kg	t (120) = 15.43	<0.0001	9.1 vs 100.0	4.7 vs 0.0
					30 min: 3 mg/kg vs. 10 mg/kg	t (120) = 4.192	0.0295	12.8 vs 37.5	4.8 vs 6.7
					30 min: 3 mg/kg vs. 30 mg/kg	t (120) = 11.07	<0.0001	12.8 vs 78.0	4.8 vs 9.8
					30 min: 3 mg/kg vs. 100 mg/kg	t (120) = 14.8	<0.0001	12.8 vs 100.0	4.8 vs 0.0
					30 min: 10 mg/kg vs. 30 mg/kg	t (120) = 6.874	<0.0001	37.5 vs 78.0	6.7 vs 9.8
					30 min: 10 mg/kg vs. 100 mg/kg	t (120) = 10.61	<0.0001	37.5 vs 100.0	6.7 vs 0.0
					30 min: 30 mg/kg vs. 100 mg/kg	t (120) = 3.734	0.0695	78.0 vs 100.0	9.8 vs 0.0
					60 min: Vehicle vs. 3 mg/kg	t (120) = 0.7808	0.9815	8.5 vs 3.9	5.6 vs 6.7
					60 min: Vehicle vs. 10 mg/kg	t (120) = 2.478	0.4063	8.5 vs 23.1	5.6 vs 3.5
					60 min: Vehicle vs. 30 mg/kg	t (120) = 6.45	0.0001	8.5 vs 46.5	5.6 vs 11.2
					60 min: Vehicle vs. 100 mg/kg	t (120) = 15.53	<0.0001	8.5 vs 100.0	5.6 vs 0.0
					60 min: 3 mg/kg vs. 10 mg/kg	t (120) = 3.259	0.1507	3.9 vs 23.1	6.7 vs 3.5
					60 min: 3 mg/kg vs. 30 mg/kg	t (120) = 7.231	<0.0001	3.9 vs 46.5	6.7 vs 11.2
					60 min: 3 mg/kg vs. 100 mg/kg	t (120) = 16.31	<0.0001	3.9 vs 100.0	6.7 vs 0.0
					60 min: 10 mg/kg vs. 30 mg/kg	t (120) = 3.972	0.0452	23.1 vs 46.5	3.5 vs 11.2
					60 min: 10 mg/kg vs. 100 mg/kg	t (120) = 13.05	<0.0001	23.1 vs 100.0	3.5 vs 0.0
					60 min: 30 mg/kg vs. 100 mg/kg	t (120) = 9.081	<0.0001	46.5 vs 100.0	11.2 vs 0.0
					120 min: Vehicle vs. 3 mg/kg	t (120) = 0.01697	>0.9999	-1.1 vs -1.0	4.8 vs 6.2
					120 min: Vehicle vs. 10 mg/kg	t (120) = 0.4074	0.9985	-1.1 vs -3.5	4.8 vs 3.5
					120 min: Vehicle vs. 30 mg/kg	t (120) = 1.697	0.7513	-1.1 vs 8.9	4.8 vs 8.0
					120 min: Vehicle vs. 100 mg/kg	t (120) = 15.84	<0.0001	-1.1 vs 92.2	4.8 vs 5.8
					120 min: 3 mg/kg vs. 10 mg/kg	t (120) = 0.4243	0.9982	-1.0 vs -3.5	6.2 vs 3.5
					120 min: 3 mg/kg vs. 30 mg/kg	t (120) = 1.68	0.7581	-1.0 vs 8.9	6.2 vs 8.0
					120 min: 3 mg/kg vs. 100 mg/kg	t (120) = 15.82	<0.0001	-1.0 vs 92.2	6.2 vs 5.8
					120 min: 10 mg/kg vs. 30 mg/kg	t (120) = 2.105	0.5721	-3.5 vs 8.9	3.5 vs 8.0
					120 min: 10 mg/kg vs. 100 mg/kg	t (120) = 16.24	<0.0001	-3.5 vs 92.2	8.0 vs 5.8
					120 min: 30 mg/kg vs. 100 mg/kg	t (120) = 14.14	<0.0001	8.9 vs 92.2	8.0 vs 5.8
					240 min: Vehicle vs. 3 mg/kg	t (120) = 1.816	0.7014	-5.5 vs 5.2	6.0 vs 4.9
					240 min: Vehicle vs. 10 mg/kg	t (120) = 0.5431	0.9953	-5.5 vs -2.3	6.0 vs 3.1
					240 min: Vehicle vs. 30 mg/kg	t (120) = 1.273	0.8963	-5.5 vs 2.0	6.0 vs 5.2
					240 min: Vehicle vs. 100 mg/kg	t (120) = 9.318	<0.0001	-5.5 vs 49.4	6.0 vs 11.2
					240 min: 3 mg/kg vs. 10 mg/kg	t (120) = 1.273	0.8963	5.2 vs -2.3	4.9 vs 3.1
					240 min: 3 mg/kg vs. 30 mg/kg	t (120) = 0.5431	0.9953	5.2 vs 2.0	4.9 vs 5.3
					240 min: 3 mg/kg vs. 100 mg/kg	t (120) = 7.502	<0.0001	5.2 vs 49.4	4.9 vs 11.2
					240 min: 10 mg/kg vs. 30 mg/kg	t (120) = 0.7298	0.9856	-2.3 vs 2.0	3.1 vs 5.3
					240 min: 10 mg/kg vs. 100 mg/kg	t (120) = 8.775	<0.0001	-2.3 vs 49.4	3.1 vs 11.2
					240 min: 30 mg/kg vs. 100 mg/kg	t (120) = 8.045	<0.0001	2.0 vs 49.4	5.3 vs 11.2
S1g	male n = 5 per dose	Body temperature time course for (R,S)-methadone	Dose	Repeated Measures Two-Way ANOVA	Dose x Time Interaction	F (20, 126) = 5.585	<0.0001
		Change in degrees			Time	F (5, 126) = 12.97	<0.0001
					Dose	F (4, 126) = 45.81	<0.0001
				Tukey's multiple comparison test	0 min: Vehicle vs 0.3 mg/kg	t (126) = 5.28E-16	>0.9999	0.0 vs 0.0	0.0 vs 0.0
					0 min: Vehicle vs 1 mg/kg	t (126) = 5.28E-16	>0.9999	0.0 vs 0.0	0.0 vs 0.0
					0 min: Vehicle vs 3 mg/kg	t (126) = 8.8E-16	>0.9999	0.0 vs 0.0	0.0 vs 0.0
					0 min: Vehicle vs 10 mg/kg	t (126) = 3.49E-15	>0.9999	0.0 vs 0.0	0.0 vs 0.0
					0 min: 0.3 mg/kg vs 1 mg/kg	t (126) = 0	>0.9999	0.0 vs 0.0	0.0 vs 0.0
					0 min: 0.3 mg/kg vs 3 mg/kg	t (126) = 1.41E-15	>0.9999	0.0 vs 0.0	0.0 vs 0.0
					0 min: 0.3 mg/kg vs 10 mg/kg	t (126) = 2.94E-15	>0.9999	0.0 vs 0.0	0.0 vs 0.0
					0 min: 1 mg/kg vs 3 mg/kg	t (126) = 1.41E-15	>0.9999	0.0 vs 0.0	0.0 vs 0.0
					0 min: 1 mg/kg vs 10 mg/kg	t (126) = 2.94E-15	>0.9999	0.0 vs 0.0	0.0 vs 0.0
					0 min: 3 mg/kg vs 10 mg/kg	t (126) = 4.41E-15	>0.9999	0.0 vs 0.0	0.0 vs 0.0
					15 min: Vehicle vs 0.3 mg/kg	t (126) = 0.951	0.962	0.1 vs 0.4	0.2 vs 0.2
					15 min: Vehicle vs 1 mg/kg	t (126) = 0.317	0.9994	0.1 vs 0.0	0.2 vs 0.1
					15 min: Vehicle vs 3 mg/kg	t (126) = 0.634	0.9916	0.1 vs 0.3	0.2 vs 0.3
					15 min: Vehicle vs 10 mg/kg	t (126) = 0.9932	0.9556	0.1 vs -0.2	0.2 vs 0.2
					15 min: 0.3 mg/kg vs 1 mg/kg	t (126) = 1.268	0.8977	0.4 vs 0.0	0.2 vs 0.1
					15 min: 0.3 mg/kg vs 3 mg/kg	t (126) = 0.317	0.9994	0.4 vs 0.3	0.2 vs 0.3
					15 min: 0.3 mg/kg vs 10 mg/kg	t (126) = 1.986	0.6258	0.4 vs -0.2	0.2 vs 0.2
					15 min: 1 mg/kg vs 3 mg/kg	t (126) = 0.951	0.962	0.0 vs 0.3	0.1 vs 0.3
					15 min: 1 mg/kg vs 10 mg/kg	t (126) = 0.6622	0.99	0.0 vs -0.2	0.1 vs 0.2
					15 min: 3 mg/kg vs 10 mg/kg	t (126) = 1.655	0.7681	0.3 vs -0.2	0.3 vs 0.2
					30 min: Vehicle vs 0.3 mg/kg	t (126) = 0.634	0.9916	0.3 vs 0.5	0.2 vs 0.3
					30 min: Vehicle vs 1 mg/kg	t (126) = 0.634	0.9916	0.3 vs 0.5	0.2 vs 0.1
					30 min: Vehicle vs 3 mg/kg	t (126) = 0.317	0.9994	0.3 vs 0.4	0.2 vs 0.3
					30 min: Vehicle vs 10 mg/kg	t (126) = 3.973	0.0448	0.3 vs -0.9	0.2 vs 0.3
					30 min: 0.3 mg/kg vs 1 mg/kg	t (126) = 0	>0.9999	0.5 vs 0.5	0.3 vs 0.1
					30 min: 0.3 mg/kg vs 3 mg/kg	t (126) = 0.317	0.9994	0.5 vs 0.4	0.3 vs 0.3
					30 min: 0.3 mg/kg vs 10 mg/kg	t (126) = 4.635	0.0116	0.5 vs -0.9	0.3 vs 0.3
					30 min: 1 mg/kg vs 3 mg/kg	t (126) = 0.317	0.9994	0.5 vs 0.4	0.1 vs 0.3
					30 min: 1 mg/kg vs 10 mg/kg	t (126) = 4.635	0.0116	0.5 vs -0.9	0.1 vs 0.3
					30 min: 3 mg/kg vs 10 mg/kg	t (126) = 4.304	0.0234	0.4 vs -0.9	0.3 vs 0.3
					60 min: Vehicle vs 0.3 mg/kg	t (126) = 1.268	0.8977	0.1 vs 0.5	0.1 vs 0.3
					60 min: Vehicle vs 1 mg/kg	t (126) = 2.219	0.52	0.1 vs 0.8	0.1 vs 0.2
					60 min: Vehicle vs 3 mg/kg	t (126) = 0.951	0.962	0.1 vs -0.2	0.1 vs 0.3
					60 min: Vehicle vs 10 mg/kg	t (126) = 8.939	<0.0001	0.1 vs -2.6	0.1 vs 0.5
					60 min: 0.3 mg/kg vs 1 mg/kg	t (126) = 0.951	0.962	0.5 vs 0.8	0.3 vs 0.2
					60 min: 0.3 mg/kg vs 3 mg/kg	t (126) = 2.219	0.52	0.5 vs -0.2	0.3 vs 0.3
					60 min: 0.3 mg/kg vs 10 mg/kg	t (126) = 10.26	<0.0001	0.5 vs -2.6	0.3 vs 0.5
					60 min: 1 mg/kg vs 3 mg/kg	t (126) = 3.17	0.1714	0.8 vs -0.2	0.2 vs 0.3
					60 min: 1 mg/kg vs 10 mg/kg	t (126) = 11.26	<0.0001	0.8 vs -2.6	0.2 vs 0.5
					60 min: 3 mg/kg vs 10 mg/kg	t (126) = 7.946	<0.0001	-0.2 vs -2.6	0.3 vs 0.5
					120 min: Vehicle vs 0.3 mg/kg	t (126) = 1.585	0.7953	-0.5 vs 0.0	0.2 vs 0.1
					120 min: Vehicle vs 1 mg/kg	t (126) = 3.17	0.1714	-0.5 vs 0.5	0.2 vs 0.1
					120 min: Vehicle vs 3 mg/kg	t (126) = 0	>0.9999	-0.5 vs -0.5	0.2 vs 0.6
					120 min: Vehicle vs 10 mg/kg	t (126) = 11.59	<0.0001	-0.5 vs -4.0	0.2 vs 0.6
					120 min: 0.3 mg/kg vs 1 mg/kg	t (126) = 1.585	0.7953	0.0 vs 0.5	0.1 vs 0.1
					120 min: 0.3 mg/kg vs 3 mg/kg	t (126) = 1.585	0.7953	0.0 vs -0.5	0.1 vs 0.6
					120 min: 0.3 mg/kg vs 10 mg/kg	t (126) = 13.24	<0.0001	0.0 vs -4.0	0.1 vs 0.6
					120 min: 1 mg/kg vs 3 mg/kg	t (126) = 3.17	0.1714	0.5 vs -0.5	0.1 vs 0.6
					120 min: 1 mg/kg vs 10 mg/kg	t (126) = 14.9	<0.0001	0.5 vs -4.0	0.1 vs 0.6
					120 min: 3 mg/kg vs 10 mg/kg	t (126) = 11.59	<0.0001	-0.5 vs -4.0	0.6 vs 0.6
					240 min: Vehicle vs 0.3 mg/kg	t (126) = 0.951	0.962	-0.7 vs -0.4	0.1 vs 0.3
					240 min: Vehicle vs 1 mg/kg	t (126) = 1.268	0.8977	-0.7 vs -0.3	0.1 vs 0.2
					240 min: Vehicle vs 3 mg/kg	t (126) = 0.317	0.9994	-0.7 vs -0.6	0.1 vs 0.3
					240 min: Vehicle vs 10 mg/kg	t (126) = 6.622	<0.0001	-0.7 vs -2.7	0.1 vs 0.7
					240 min: 0.3 mg/kg vs 1 mg/kg	t (126) = 0.317	0.9994	-0.4 vs -0.3	0.3 vs 0.2
					240 min: 0.3 mg/kg vs 3 mg/kg	t (126) = 0.634	0.9916	-0.4 vs -0.6	0.3 vs 0.3
					240 min: 0.3 mg/kg vs 10 mg/kg	t (126) = 7.615	<0.0001	-0.4 vs -2.7	0.3 vs 0.7
					240 min: 1 mg/kg vs 3 mg/kg	t (126) = 0.951	0.962	-0.3 vs -0.6	0.2 vs 0.3
					240 min: 1 mg/kg vs 10 mg/kg	t (126) = 7.946	<0.0001	-0.3 vs -2.7	0.2 vs 0.7
					240 min: 3 mg/kg vs 10 mg/kg	t (126) = 6.953	<0.0001	-0.6 vs -2.7	0.3 vs 0.7
S1h	male n = 5 per dose	Body temperature time course for (R)-methadone	Dose	Repeated Measures Two-Way ANOVA	Dose x Time Interaction	F (20, 126) = 13.41	<0.0001
		Change in degrees			Time	F (5, 126) = 31.82	<0.0001
					Dose	F (4, 126) = 105.7	<0.0001
				Tukey's multiple comparison test	0 min: Vehicle vs 0.1 mg/kg	t (126) = 1.43E-15	>0.9999	0.0 vs 0.0	0.0 vs 0.0
					0 min: Vehicle vs 0.3 mg/kg	t (126) = 1.30E-16	>0.9999	0.0 vs 0.0	0.0 vs 0.0
					0 min: Vehicle vs 1 mg/kg	t (126) = 1.30E-16	>0.9999	0.0 vs 0.0	0.0 vs 0.0
					0 min: Vehicle vs 3 mg/kg	t (126) = 1.49E-15	>0.9999	0.0 vs 0.0	0.0 vs 0.0
					0 min: 0.1 mg/kg vs 0.3 mg/kg	t (126) = 1.56E-15	>0.9999	0.0 vs 0.0	0.0 vs 0.0
					0 min: 0.1 mg/kg vs 1 mg/kg	t (126) = 1.56E-15	>0.9999	0.0 vs 0.0	0.0 vs 0.0
					0 min: 0.1 mg/kg vs 3 mg/kg	t (126) = 0	>0.9999	0.0 vs 0.0	0.0 vs 0.0
					0 min: 0.3 mg/kg vs 1 mg/kg	t (126) = 0	>0.9999	0.0 vs 0.0	0.0 vs 0.0
					0 min: 0.3 mg/kg vs 3 mg/kg	t (126) = 1.63E-15	>0.9999	0.0 vs 0.0	0.0 vs 0.0
					0 min: 1 mg/kg vs 3 mg/kg	t (126) = 1.63E-15	>0.9999	0.0 vs 0.0	0.0 vs 0.0
					15 min: Vehicle vs 0.1 mg/kg	t (126) = 0.937	0.964	0.4 vs 0.6	0.1 vs 0.1
					15 min: Vehicle vs 0.3 mg/kg	t (126) = 1.593	0.7923	0.4 vs 0.06	0.1 vs 0.1
					15 min: Vehicle vs 1 mg/kg	t (126) = 0.4685	0.9974	0.4 vs 0.3	0.1 vs 0.1
					15 min: Vehicle vs 3 mg/kg	t (126) = 2.447	0.4194	0.4 vs -0.1	0.1 vs 0.2
					15 min: 0.1 mg/kg vs 0.3 mg/kg	t (126) = 2.53	0.3845	0.6 vs 0.06	0.1 vs 0.1
					15 min: 0.1 mg/kg vs 1 mg/kg	t (126) = 1.406	0.8577	0.6 vs 0.3	0.1 vs 0.1
					15 min: 0.1 mg/kg vs 3 mg/kg	t (126) = 3.425	0.1161	0.6 vs -0.1	0.1 vs 0.2
					15 min: 0.3 mg/kg vs 1 mg/kg	t (126) = 1.124	0.9316	0.06 vs 0.3	0.1 vs 0.1
					15 min: 0.3 mg/kg vs 3 mg/kg	t (126) = 0.783	0.9813	0.06 vs -0.1	0.1 vs 0.2
					15 min: 1 mg/kg vs 3 mg/kg	t (126) = 1.957	0.639	0.3 vs -0.1	0.1 vs 0.2
					30 min: Vehicle vs 0.1 mg/kg	t (126) = 0.937	0.964	0.4 vs 0.6	0.1 vs 0.1
					30 min: Vehicle vs 0.3 mg/kg	t (126) = 2.811	0.278	0.4 vs 1.0	0.1 vs 0.2
					30 min: Vehicle vs 1 mg/kg	t (126) = 0.937	0.964	0.4 vs 0.6	0.1 vs 0.2
					30 min: Vehicle vs 3 mg/kg	t (126) = 5.872	0.0006	0.4 vs -0.8	0.1 vs 0.1
					30 min: 0.1 mg/kg vs 0.3 mg/kg	t (126) = 1.874	0.6761	0.6 vs 1.0	0.1 vs 0.2
					30 min: 0.1 mg/kg vs 1 mg/kg	t (126) = 2.08E-15	>0.9999	0.6 vs 0.6	0.1 vs 0.2
					30 min: 0.1 mg/kg vs 3 mg/kg	t (126) = 6.851	<0.0001	0.6 vs -0.8	0.1 vs 0.1
					30 min: 0.3 mg/kg vs 1 mg/kg	t (126) = 1.874	0.6761	1.0 vs 0.6	0.2 vs 0.2
					30 min: 0.3 mg/kg vs 3 mg/kg	t (126) = 8.808	<0.0001	1.0 vs -0.8	0.2 vs 0.1
					30 min: 1 mg/kg vs 3 mg/kg	t (126) = 6.851	<0.0001	0.6 vs -0.8	0.2 vs 0.1
					60 min: Vehicle vs 0.1 mg/kg	t (126) = 1.874	0.6761	0.1 vs 0.5	0.1 vs 0.2
					60 min: Vehicle vs 0.3 mg/kg	t (126) = 4.217	0.0279	0.1 vs 1.0	0.1 vs 0.3
					60 min: Vehicle vs 1 mg/kg	t (126) = 4.217	0.0279	0.1 vs 1.0	0.1 vs 0.2
					60 min: Vehicle vs 3 mg/kg	t (126) = 10.28	<0.0001	0.1 vs -2.0	0.1 vs 0.2
					60 min: 0.1 mg/kg vs 0.3 mg/kg	t (126) = 2.343	0.4646	0.5 vs 1.0	0.2 vs 0.3
					60 min: 0.1 mg/kg vs 1 mg/kg	t (126) = 2.343	0.4646	0.5 vs 1.0	0.2 vs 0.2
					60 min: 0.1 mg/kg vs 3 mg/kg	t (126) = 12.23	<0.0001	0.5 vs -2.0	0.2 vs 0.2
					60 min: 0.3 mg/kg vs 1 mg/kg	t (126) = 0	>0.9999	1.0 vs 1.0	0.3 vs 0.2
					60 min: 0.3 mg/kg vs 3 mg/kg	t (126) = 14.68	<0.0001	1.0 vs -2.0	0.3 vs 0.2
					60 min: 1 mg/kg vs 3 mg/kg	t (126) = 14.68	<0.0001	1.0 vs -2.0	0.2 vs 0.2
					120 min: Vehicle vs 0.1 mg/kg	t (126) = 1.874	0.6761	-0.5 vs -0.1	0.3 vs 0.2
					120 min: Vehicle vs 0.3 mg/kg	t (126) = 4.685	0.0104	-0.5 vs 0.5	0.3 vs 0.4
					120 min: Vehicle vs 1 mg/kg	t (126) = 6.091	0.0003	-0.5 vs 0.8	0.3 vs 0.3
					120 min: Vehicle vs 3 mg/kg	t (126) = 17.13	<0.0001	-0.5 vs -4.0	0.3 vs 0.3
					120 min: 0.1 mg/kg vs 0.3 mg/kg	t (126) = 2.811	0.278	-0.1 vs 0.5	0.2 vs 0.4
					120 min: 0.1 mg/kg vs 1 mg/kg	t (126) = 4.217	0.0279	-0.1 vs 0.8	0.2 vs 0.3
					120 min: 0.1 mg/kg vs 3 mg/kg	t (126) = 19.08	<0.0001	-0.1 vs -4.0	0.2 vs 0.3
					120 min: 0.3 mg/kg vs 1 mg/kg	t (126) = 1.406	0.8577	0.5 vs 0.8	0.4 vs 0.3
					120 min: 0.3 mg/kg vs 3 mg/kg	t (126) = 22.02	<0.0001	0.5 vs -4.0	0.4 vs 0.3
					120 min: 1 mg/kg vs 3 mg/kg	t (126) = 23.49	<0.0001	0.8 vs -4.0	0.3 vs 0.3
					240 min: Vehicle vs 0.1 mg/kg	t (126) = 0.4685	0.9974	-0.8 vs -0.7	0.2 vs 0.3
					240 min: Vehicle vs 0.3 mg/kg	t (126) = 1.406	0.8577	-0.8 vs -0.5	0.2 vs 0.4
					240 min: Vehicle vs 1 mg/kg	t (126) = 3.748	0.0675	-0.8 vs 0.0	0.2 vs 0.2
					240 min: Vehicle vs 3 mg/kg	t (126) = 9.298	<0.0001	-0.8 vs -2.7	0.2 vs 0.3
					240 min: 0.1 mg/kg vs 0.3 mg/kg	t (126) = 0.937	0.964	-0.7 vs -0.5	0.3 vs 0.4
					240 min: 0.1 mg/kg vs 1 mg/kg	t (126) = 3.28	0.1457	-0.7 vs 0.0	0.3 vs 0.2
					240 min: 0.1 mg/kg vs 3 mg/kg	t (126) = 9.787	<0.0001	-0.7 vs -2.7	0.3 vs 0.3
					240 min: 0.3 mg/kg vs 1 mg/kg	t (126) = 2.343	0.4646	-0.5 vs 0.0	0.4 vs 0.2
					240 min: 0.3 mg/kg vs 3 mg/kg	t (126) = 10.77	<0.0001	-0.5 vs -2.7	0.4 vs 0.3
					240 min: 1 mg/kg vs 3 mg/kg	t (126) = 13.21	<0.0001	0.0 vs -2.7	0.2 vs 0.3
S1i	male n = 5 per dose	Body temperature time course for (S)-methadone	Dose	Repeated Measures Two-Way ANOVA	Dose x Time Interaction	F (20, 126) = 3.064	<0.0001
		Change in degrees			Time	F (5, 126) = 17.25	<0.0001
					Dose	F (4, 126) = 33.28	<0.0001
				Tukey's multiple comparison test	0 min: Vehicle vs. 3 mg/kg	t (126) = 1.33E-15	>0.9999	0.0 vs 0.0	0.0 vs 0.0
					0 min: Vehicle vs. 10 mg/kg	t (126) = 6.67E-16	>0.9999	0.0 vs 0.0	0.0 vs 0.0
					0 min: Vehicle vs. 30 mg/kg	t (126) = 2.75E-15	>0.9999	0.0 vs 0.0	0.0 vs 0.0
					0 min: Vehicle vs. 100 mg/kg	t (126) = 0	>0.9999	0.0 vs 0.0	0.0 vs 0.0
					0 min: 3 mg/kg vs. 10 mg/kg	t (126) = 2.00E-15	>0.9999	0.0 vs 0.0	0.0 vs 0.0
					0 min: 3 mg/kg vs. 30 mg/kg	t (126) = 1.42E-15	>0.9999	0.0 vs 0.0	0.0 vs 0.0
					0 min: 3 mg/kg vs. 100 mg/kg	t (126) = 1.39E-15	>0.9999	0.0 vs 0.0	0.0 vs 0.0
					0 min: 10 mg/kg vs. 30 mg/kg	t (126) = 3.42E-15	>0.9999	0.0 vs 0.0	0.0 vs 0.0
					0 min: 10 mg/kg vs. 100 mg/kg	t (126) = 6.96E-16	>0.9999	0.0 vs 0.0	0.0 vs 0.0
					0 min: 30 mg/kg vs. 100 mg/kg	t (126) = 2.87E-15	>0.9999	0.0 vs 0.0	0.0 vs 0.0
					15 min: Vehicle vs. 3 mg/kg	t (126) = 0.6004	0.9931	0.5 vs 0.7	0.1 vs 0.1
					15 min: Vehicle vs. 10 mg/kg	t (126) = 0.6004	0.9931	0.5 vs 0.7	0.1 vs 0.1
					15 min: Vehicle vs. 30 mg/kg	t (126) = 1.201	0.9146	0.5 vs 0.1	0.1 vs 0.1
					15 min: Vehicle vs. 100 mg/kg	t (126) = 1.881	0.6729	0.5 vs -0.1	0.1 vs 0.1
					15 min: 3 mg/kg vs. 10 mg/kg	t (126) = 2.00.	>0.9999	0.7 vs 0.7	0.1 vs 0.1
					15 min: 3 mg/kg vs. 30 mg/kg	t (126) = 1.801	0.7078	0.7 vs 0.1	0.1 vs 0.1
					15 min: 3 mg/kg vs. 100 mg/kg	t (126) = 2.509	0.3934	0.7 vs -0.1	0.1 vs 0.1
					15 min: 10 mg/kg vs. 30 mg/kg	t (126) = 1.801	0.7078	0.7 vs 0.1	0.1 vs 0.1
					15 min: 10 mg/kg vs. 100 mg/kg	t (126) = 2.509	0.3934	0.7 vs -0.1	0.1 vs 0.1
					15 min: 30 mg/kg vs. 100 mg/kg	t (126) = 0.6271	0.9919	0.1 vs -0.1	0.1 vs 0.1
					30 min: Vehicle vs. 3 mg/kg	t (126) = 0.9006	0.9688	0.4 vs 0.7	0.1 vs 0.1
					30 min: Vehicle vs. 10 mg/kg	t (126) = 1.801	0.7078	0.4 vs 1.0	0.1 vs 0.2
					30 min: Vehicle vs. 30 mg/kg	t (126) = 0.6004	0.9931	0.4 vs 0.2	0.1 vs 0.2
					30 min: Vehicle vs. 100 mg/kg	t (126) = 3.136	0.1801	0.4 vs -0.6	0.1 vs 0.3
					30 min: 3 mg/kg vs. 10 mg/kg	t (126) = 0.9006	0.9688	0.7 vs 1.0	0.1 vs 0.2
					30 min: 3 mg/kg vs. 30 mg/kg	t (126) = 1.501	0.8258	0.7 vs 0.2	0.1 vs 0.2
					30 min: 3 mg/kg vs. 100 mg/kg	t (126) = 4.076	0.0368	0.7 vs -0.6	0.1 vs 0.3
					30 min: 10 mg/kg vs. 30 mg/kg	t (126) = 2.402	0.4387	1.0 vs 0.2	0.2 vs 0.2
					30 min: 10 mg/kg vs. 100 mg/kg	t (126) = 5.017	0.0049	1.0 vs -0.6	0.2 vs 0.3
					30 min: 30 mg/kg vs. 100 mg/kg	t (126) = 2.509	0.3934	0.2 vs -0.6	0.2 vs 0.3
					60 min: Vehicle vs. 3 mg/kg	t (126) = 0.3002	0.9995	0.5 vs 0.6	0.1 vs 0.2
					60 min: Vehicle vs. 10 mg/kg	t (126) = 1.201	0.9146	0.5 vs 0.9	0.1 vs 0.3
					60 min: Vehicle vs. 30 mg/kg	t (126) = 2.102	0.5735	0.5 vs -0.2	0.1 vs 0.2
					60 min: Vehicle vs. 100 mg/kg	t (126) = 5.958	0.0005	0.5 vs -1.4	0.1 vs 0.3
					60 min: 3 mg/kg vs. 10 mg/kg	t (126) = 0.9006	0.9688	0.6 vs 0.9	0.2 vs 0.3
					60 min: 3 mg/kg vs. 30 mg/kg	t (126) = 2.402	0.4387	0.6 vs -0.2	0.2 vs 0.2
					60 min: 3 mg/kg vs. 100 mg/kg	t (126) = 6.271	0.0002	0.6 vs -1.4	0.2 vs 0.3
					60 min: 10 mg/kg vs. 30 mg/kg	t (126) = 3.302	0.1407	0.9 vs -0.2	0.3 vs 0.2
					60 min: 10 mg/kg vs. 100 mg/kg	t (126) = 7.212	<0.0001	0.9 vs -1.4	0.3 vs 0.3
					60 min: 30 mg/kg vs. 100 mg/kg	t (126) = 3.763	0.0658	-0.2 vs -1.4	0.2 vs 0.3
					120 min: Vehicle vs. 3 mg/kg	t (126) = 0	>0.9999	0.2 vs 0.2	0.3 vs 0.3
					120 min: Vehicle vs. 10 mg/kg	t (126) = 1.201	0.9146	0.2 vs 0.6	0.3 vs 0.3
					120 min: Vehicle vs. 30 mg/kg	t (126) = 2.402	0.4387	0.2 vs -0.6	0.3 vs 0.5
					120 min: Vehicle vs. 100 mg/kg	t (126) = 9.407	<0.0001	0.2 vs -2.8	0.3 vs 0.8
					120 min: 3 mg/kg vs. 10 mg/kg	t (126) = 1.201	0.9146	0.2 vs 0.6	0.3 vs 0.3
					120 min: 3 mg/kg vs. 30 mg/kg	t (126) = 2.402	0.4387	0.2 vs -0.6	0.3 vs 0.5
					120 min: 3 mg/kg vs. 100 mg/kg	t (126) = 9.407	<0.0001	0.2 vs -2.8	0.3 vs 0.8
					120 min: 10 mg/kg vs. 30 mg/kg	t (126) = 3.603	0.0868	0.6 vs -0.6	0.3 vs 0.5
					120 min: 10 mg/kg vs. 100 mg/kg	t (126) = 10.66	<0.0001	0.6 vs -2.8	0.3 vs 0.8
					120 min: 30 mg/kg vs. 100 mg/kg	t (126) = 6.898	<0.0001	-0.6 vs -2.8	0.5 vs 0.8
					240 min: Vehicle vs. 3 mg/kg	t (126) = 0.6004	0.9931	-0.7 vs -0.5	0.2 vs 0.3
					240 min: Vehicle vs. 10 mg/kg	t (126) = 0.6004	0.9931	-0.7 vs -0.5	0.2 vs 0.4
					240 min: Vehicle vs. 30 mg/kg	t (126) = 0.9006	0.9688	-0.7 vs -1.0	0.2 vs 0.4
					240 min: Vehicle vs. 100 mg/kg	t (126) = 8.466	<0.0001	-0.7 vs -3.4	0.2 vs 0.8
					240 min: 3 mg/kg vs. 10 mg/kg	t (126) = 3.33E-15	>0.9999	-0.5 vs -0.5	0.3 vs 0.4
					240 min: 3 mg/kg vs. 30 mg/kg	t (126) = 1.501	0.8258	-0.5 vs -1.0	0.3 vs 0.4
					240 min: 3 mg/kg vs. 100 mg/kg	t (126) = 9.093	<0.0001	-0.5 vs -3.4	0.3 vs 0.8
					240 min: 10 mg/kg vs. 30 mg/kg	t (126) = 1.501	0.8258	-0.5 vs -1.0	0.4 vs 0.4
					240 min: 10 mg/kg vs. 100 mg/kg	t (126) = 9.093	<0.0001	-0.5 vs -3.4	0.4 vs 0.8
					240 min: 30 mg/kg vs. 100 mg/kg	t (126) = 7.526	<0.0001	-1.0 vs -3.4	0.4 vs 0.8
S2a	CHO-K1, KET, or MDCKII cells	Competative inhibition of each transporter by R-methadone			OCT1			81.55	0.25
	n = 2 per transporter				BSEP			45.55	12.85
					OCT2			29.4	0.5
					OATP1B3			19.1	1.4
					MATE1			15.65	0.25
					BCRP			3.45	0.45
					P-gp			-1.35	0.45
					MATE2-K			-1.45	2.05
					OATP1B1			-2.85	1.05
					MRP2			-1.95	1.95
					OAT1			-4.15	2.25
					OAT3			-10.85	3.05
S2b	CHO-K1, KET, or MDCKII cells	Competative inhibition of each transporter by S-methadone			OCT1			41.45	4.65
	n = 2 per transporter				BSEP			17.05	21.5
					OCT2			19.05	0.55
					OATP1B3			9.9	5.2
					MATE1			18.45	0.25
					BCRP			2.65	1.25
					P-gp			-1.3	0.1
					MATE2-K			-6.45	1.75
					OATP1B1			-1.8	0.3
					MRP2			-2.3	1
					OAT1			4.55	4.95
					OAT3			-15.75	0.55
S2c	Rat liver microsomes n=3	Metabolic stability of (R,S)-methadone	Presence of NADPH	Repeated Measures Two-Way ANOVA	Time x NADPH	F (2, 8) = 21.92	0.0006
					Time	F (2, 8) = 24.13	0.0004
					NADPH	F (1, 4) = 133.4	0.0003
				Holm-Šídák's multiple comparisons test	0 min: NADPH + vs NADPH -	t (12) = 0	>0.9999	100.0 vs 100.0	1.528 vs 3.215
					30 min: NADPH + vs NADPH -	t (12) = 6.018	0.0001	79.0 vs 100.7	2.082 vs 1.856
					60 min: NADPH + vs NADPH -	t (12) = 10.09	<0.0001	62.67 vs 99.0	3.480 vs 2.517
S2d	Rat liver microsomes n=3	Metabolic stability of (R)-methadone	Presence of NADPH	Repeated Measures Two-Way ANOVA	Time x NADPH interaction	F (2, 8) = 26.66	0.0003
					Time	F (2, 8) = 25.82	0.0003
					NADPH	F (1, 4) = 55.28	0.0017
				Holm-Šídák's multiple comparisons test	0 min: NADPH + vs NADPH -	t (12) = 0	>0.9999	100.0 vs 100.0	2.082 vs 1.528
					30 min: NADPH + vs NADPH -	t (12) = 4.57	0.0013	82.33 vs 98.33	0.882 vs 4.096
					60 min: NADPH + vs NADPH -	t (12) = 9.711	<0.0001	66.33 vs 100.3	2.404 vs 2.603
S2e	Rat liver microsomes n=3	Metabolic stability of (S)-methadone	Presence of NADPH	Repeated Measures Two-Way ANOVA	Time x NADPH interaction	F (2, 8) = 39.04	<0.0001
					Time	F (2, 8) = 46.54	<0.0001
					NADPH	F (1, 4) = 154.9	0.0002
				Holm-Šídák's multiple comparisons test	0 min: NADPH + vs NADPH -	t (12) = 0.1054	0.9178	100.0 vs 100.3	4.041 vs 1.202
					30 min: NADPH + vs NADPH -	t (12) = 7.8	<0.0001	76.33 vs 101.0	0.882 vs 2.517
					60 min: NADPH + vs NADPH -	t (12) = 12.75	<0.0001	58.0 vs 98.33	1.0 vs 2.028
S2f	Human liver microsomes n=3	Metabolic stability of (R,S)-methadone	Presence of NADPH	Repeated Measures Two-Way ANOVA	Time x NADPH interaction	F (2, 8) = 0.3873	0.6909
					Time	F (2, 8) = 6.557	0.0206
					NADPH	F (1, 4) = 0.6282	0.4724
				Holm-Šídák's multiple comparisons test	0 min: NADPH + vs NADPH -	t (12) = 0	>0.9999	100.0 vs 100.0	2.517 vs 1
					30 min: NADPH + vs NADPH -	t (12) = 1.133	0.6259	106.3 vs 114.0	1.764 vs 3.215
					60 min: NADPH + vs NADPH -	t (12) = 0.4432	0.8881	93.0 vs 96.0	4.726 vs 9.713
S2g	Human liver microsomes n=3	Metabolic stability of (R)-methadone	Presence of NADPH	Repeated Measures Two-Way ANOVA	Time x NADPH interaction	F (2, 8) = 0.5344	0.6056
					Time	F (2, 8) = 1.737	0.2363
					NADPH	F (1, 4) = 14.46	0.0191
				Holm-Šídák's multiple comparisons test	0 min: NADPH + vs NADPH -	t (12) = 0	>0.9999	100.0 vs 100.0	6.506 vs 2.646
					30 min: NADPH + vs NADPH -	t (12) = 1.135	0.4793	110.7 vs 104.7	3.712 vs 1.202
					60 min: NADPH + vs NADPH -	t (12) = 1.703	0.3052	105.7 vs 96.67	1.333 vs 4.177
S2h	Human liver microsomes n=3	Metabolic stability of (S)-methadone	Presence of NADPH	Repeated Measures Two-Way ANOVA	Time x NADPH interaction	F (2, 8) = 0.7367	0.5086
					Time	F (2, 8) = 0.6155	0.5641
					NADPH	F (1, 4) = 2.371	0.1985
S3a	(R)-methadone female n = 4, male n = 2	Infusions of drug by session	Drug	Repeated Measures Two-Way ANOVA	Session x Drug interaction	F (9, 81) = 12.17	<0.0001
	(S)-methadone female n = 1, male n = 4	Each drug at 50 μg/kg/infusion				F (9, 81) = 6.740	<0.0001
						F (1, 9) = 59.67	<0.0001
				Holm-Šídák's multiple comparisons test	Session 1: R vs S	t (90) = 0.7009	0.5624	8.167 vs 6.2	1.579 vs 1.241
					Session 2: R vs S	t (90) = 0.9623	0.5624	9.5 vs 6.8	1.648 vs 1.356
					Session 3: R vs S	t (90) = 1.342	0.4543	9.167 vs 5.4	1.778 vs 0.927
					Session 4: R vs S	t (90) = 3.255	0.0064	11.333 vs 2.2	2.028 vs 0.374
					Session 5: R vs S	t (90) = 4.491	0.0001	17 vs 4.4	1.571 vs 1.568
					Session 6: R vs S	t (90) = 4.788	<0.0001	14.833 vs 1.4	2.182 vs 0.748
					Session 7: R vs S	t (90) = 4.621	<0.0001	15.167 vs 2.2	2.167 vs 0.374
					Session 8: R vs S	t (90) = 5.275	<0.0001	19 vs 4.2	2.033 vs 1.53
					Session 9: R vs S	t (90) = 6.534	<0.0001	20.333 vs 2	1.944 vs 0.632
					Session 10: R vs S	t (90) = 10.93	<0.0001	32.667 vs 2	5.004 vs 0.548
S3b	female n = 4, male n = 2	(R)-methadone dose response infusions			3.125 μg/kg/infusion			34.333	7.822
					6.25 μg/kg/infusion			58	11.679
					12.5 μg/kg/infusion			80.333	10.138
					25 μg/kg/infusion			59.5	4.448
					50 μg/kg/infusion			36.333	2.14
					100 μg/kg/infusion			19.333	1.229
S3c	(R)-MTD trained female n = 4, male n = 2	(S)-methadone dose response infusions			(R)-MTD trained: 62.5 μg/kg/infusion			21.6	1.03
	(S)-MTD trained female n = 1, male n = 2				(R)-MTD trained: 125 μg/kg/infusion			19.6	3.28
					(R)-MTD trained: 250 μg/kg/infusion			47.4	15.683
					(R)-MTD trained: 500 μg/kg/infusion			52	4.301
					(R)-MTD trained: 1000 μg/kg/infusion			30	0.894
					(S)-MTD trained: 62.5 μg/kg/infusion			7	3.786
					(S)-MTD trained: 125 μg/kg/infusion			13.333	10.349
					(S)-MTD trained: 250 μg/kg/infusion			10.667	6.766
					(S)-MTD trained: 500 μg/kg/infusion			18	15.044
					(S)-MTD trained: 1000 μg/kg/infusion			13.333	10.398
S3d	female n = 4, male n = 2	(R)-methadone cumulative dose (mg/kg)			3.125 μg/kg/infusion			0.107	0.024
					6.25 μg/kg/infusion			0.363	0.073
					12.5 μg/kg/infusion			1.004	0.127
					25 μg/kg/infusion			1.488	0.111
					50 μg/kg/infusion			1.817	0.107
					100 μg/kg/infusion			1.933	0.123
S3e	(R)-MTD trained female n = 4, male n = 2	(S)-methadone cumulative dose (mg/kg)			(R)-MTD trained: 62.5 μg/kg/infusion			1.35	0.064
	(S)-MTD trained female n = 1, male n = 2				(R)-MTD trained: 125 μg/kg/infusion			2.45	0.41
					(R)-MTD trained: 250 μg/kg/infusion			11.85	3.921
					(R)-MTD trained: 500 μg/kg/infusion			26	2.151
					(R)-MTD trained: 1000 μg/kg/infusion			30	0.894
					(S)-MTD trained: 62.5 μg/kg/infusion			0.438	0.237
					(S)-MTD trained: 125 μg/kg/infusion			1.667	1.294
					(S)-MTD trained: 250 μg/kg/infusion			2.667	1.691
					(S)-MTD trained: 500 μg/kg/infusion			9	7.522
					(S)-MTD trained: 1000 μg/kg/infusion			13.333	10.398
S4b	female n = 3, male n = 3 per drug	[3H]DAMGO specific binding in CPu (nCI/g)	Repeated Drug admin	One-Way ANOVA		F (3, 42) = 1.250	0.3036
	Female n =2, male n = 3 for saline				Saline			47.86	2.006
	(2 ROIs per animal)				(R,S)-methadone			52.92	2.791
					(R)-methadone			45.41	3.117
					(S)-methadone			46.35	3.735
S4c	female n = 3, male n = 3 per drug	[3H]DAMGO specific binding in NAc (nCI/g)	Repeated Drug admin	One-Way ANOVA		F (3, 40) = 0.9525	0.4245
	Female n =2, male n = 3 for saline				Saline			27.98	1.533
	(2 ROIs per animal)				(R,S)-methadone			30.19	1.773
	One saline animal excluded				(R)-methadone			27.41	1.03
					(S)-methadone			30.24	1.628
S4d	female n = 3, male n = 3 per drug	DAMGO-stimulated [35S]GTPγS in CPu (% basal)	Repeated Drug admin	One-Way ANOVA		F (3, 20) = 0.3066	0.8203
					Saline			211.5	25.54
					(R,S)-methadone			201.8	27.8
					(R)-methadone			193.7	19.33
					(S)-methadone			181.6	17.25
S4d	female n = 2, male n = 2 per drug	DAMGO-stimulated [35S]GTPγS in CPu (% basal)	Repeated Drug admin	One-Way ANOVA		F (3, 12) = 0.5713	0.6445
					Saline			180.5	18.21
					(R,S)-methadone			159.1	14.61
					(R)-methadone			171.7	7.615
					(S)-methadone			179.3	8.571
S5a	4 ROIs from female, 4 ROI from male	[35S]GTPγS in CPu (% basal)	Drug	One-Way ANOVA		F (2, 21) = 1.704	0.2062
			Theoretical mean = 100	One Sample t test	0 S + 1 R	t (7) = 14.04	<0.0001	187	6.194
					1 S + 1 R	t (7) = 7.262	0.0002	182.8	11.4
					10 S + 1 R	t(7) = 7.295	0.0002	164.7	8.868
S5b	4 ROIs from female, 4 ROI from male	[35S]GTPγS in NAc (% basal)	Drug	One-Way ANOVA		F (2, 21) = 2.161	0.1402
			Theoretical mean = 100	One Sample t test	0 S + 1 R	t (7) = 8.759	<0.0001	154.2	6.185
					1 S + 1 R	t (7) = 8.857	<0.0001	155.8	6.301
					10 S + 1 R	t(7) = 7.940	<0.0001	140.1	5.051
S6a	HEK-293T Cells n = 4-5	Affinity at MOR alone (in nM)		KDB1	(R,S)-methadone			3.2	0.4
					(R)-methadone			1.1	0.1
					(S)-methadone			16	3
				KDB2	(R,S)-methadone			65	9
					(R)-methadone			65	10
					(S)-methadone			1440	370
S6b	HEK-293T Cells n = 4-5	Affinity at MOR-Gal1R (in nM)		KDB1	(R,S)-methadone			2.3	0.6
					(R)-methadone			1.6	0.4
					(S)-methadone			22	3
				KDB2	(R,S)-methadone			105	25
					(R)-methadone			45	10
					(S)-methadone			1500	300
